# Supplementary material for: Automatic detection of the parasite Trypanosoma cruzi in blood smears using a machine learning approach applied to mobile phone images
Source: PeerJ. 2022 May 27;10:e13470. doi: 10.7717/peerj.13470 (PMC9150695; doi:10.7717/peerj.13470)
Supplement: Supplemental Information 1 — The columns contain the image file name (filename), the x and y position of the parasite in the image (x, y), the pointed parasite object (structure), and the postion of the object after image processing. [file peerj-10-13470-s001.csv]

filename	x	y	structure	set	new_x	new_y
field0001.jpg	904	2325	KINETOPLAST	train	201	517
field0001.jpg	864	2272	NUCLEUS	train	192	505
field0001.jpg	1769	2234	KINETOPLAST	train	393	496
field0001.jpg	2369	1995	KINETOPLAST	train	526	443
field0001.jpg	1732	2180	NUCLEUS	train	385	484
field0001.jpg	2385	2082	NUCLEUS	train	530	463
field0004.jpg	1621	875	KINETOPLAST_CELL_BODY	train	509	275
field0004.jpg	1575	851	NUCLEUS	train	494	267
field0004.jpg	1444	1238	KINETOPLAST	train	453	388
field0004.jpg	1420	1221	NUCLEUS_CELL_BODY	train	445	383
field0004.jpg	1180	1424	KINETOPLAST	train	370	447
field0004.jpg	1180	1456	NUCLEUS_CELL_BODY	train	370	457
field0004.jpg	1039	1796	NUCLEUS_CELL_BODY	train	326	563
field0004.jpg	1010	1816	KINETOPLAST_CELL_BODY	train	317	570
field0004.jpg	1735	1828	KINETOPLAST	train	544	573
field0004.jpg	1738	1765	NUCLEUS	train	545	554
field0004.jpg	1930	1709	KINETOPLAST	train	605	536
field0004.jpg	1938	1753	NUCLEUS	train	608	550
field0004.jpg	1935	2011	NUCLEUS	train	607	631
field0004.jpg	1877	1994	KINETOPLAST	train	589	626
field0004.jpg	985	2461	KINETOPLAST	train	309	772
field0004.jpg	988	2510	NUCLEUS	train	310	787
field0004.jpg	1434	2363	NUCLEUS	train	450	741
field0004.jpg	1455	2339	KINETOPLAST	train	456	734
field0005.jpg	759	1182	KINETOPLAST	train	238	371
field0005.jpg	776	1158	NUCLEUS	train	243	363
field0005.jpg	1453	1416	KINETOPLAST	train	456	444
field0005.jpg	1447	1464	NUCLEUS	train	454	459
field0005.jpg	1582	1616	KINETOPLAST	train	496	507
field0005.jpg	1560	1634	NUCLEUS	train	489	513
field0005.jpg	1301	1717	NUCLEUS_CELL_BODY	train	408	539
field0005.jpg	1279	1693	KINETOPLAST	train	401	531
field0005.jpg	1980	1858	KINETOPLAST	train	621	583
field0005.jpg	2025	1872	NUCLEUS	train	635	587
field0005.jpg	1913	2214	NUCLEUS	train	600	695
field0005.jpg	509	2257	KINETOPLAST	train	160	708
field0005.jpg	464	2271	NUCLEUS	train	146	712
field0005.jpg	772	2323	NUCLEUS	train	242	729
field0005.jpg	728	2363	KINETOPLAST	train	228	741
field0005.jpg	815	2011	KINETOPLAST	train	256	631
field0005.jpg	824	1975	NUCLEUS	train	259	620
field0005.jpg	850	2742	KINETOPLAST	train	267	860
field0005.jpg	808	2760	NUCLEUS	train	253	866
field0006.jpg	751	970	KINETOPLAST	train	236	304
field0006.jpg	714	940	NUCLEUS	train	224	295
field0006.jpg	404	1318	KINETOPLAST	train	127	413
field0006.jpg	369	1371	NUCLEUS	train	116	430
field0006.jpg	299	1445	KINETOPLAST	train	94	453
field0006.jpg	370	1467	NUCLEUS	train	116	460
field0006.jpg	253	1789	KINETOPLAST	train	79	561
field0006.jpg	273	1843	NUCLEUS	train	86	578
field0006.jpg	393	2120	KINETOPLAST	train	123	665
field0006.jpg	1254	1168	KINETOPLAST_CELL_BODY	train	393	366
field0006.jpg	1295	1170	NUCLEUS	train	406	367
field0006.jpg	1343	2075	KINETOPLAST	train	421	651
field0006.jpg	1383	2112	NUCLEUS	train	434	663
field0006.jpg	434	2162	NUCLEUS	train	136	678
field0007.jpg	983	2614	KINETOPLAST	train	218	581
field0007.jpg	1370	2429	KINETOPLAST	train	304	540
field0007.jpg	1008	2560	NUCLEUS	train	224	569
field0007.jpg	1458	1010	NUCLEUS	train	324	224
field0007.jpg	1337	2375	NUCLEUS	train	297	528
field0008.jpg	554	1731	KINETOPLAST	train	174	543
field0008.jpg	571	1797	NUCLEUS_CELL_BODY	train	179	564
field0009.jpg	1627	1183	KINETOPLAST_CELL_BODY	train	510	371
field0009.jpg	1642	1125	NUCLEUS_CELL_BODY	train	515	353
field0009.jpg	240	1968	NUCLEUS	train	75	617
field0009.jpg	363	2041	NUCLEUS	train	114	640
field0009.jpg	355	1999	KINETOPLAST	train	111	627
field0009.jpg	962	1782	KINETOPLAST	train	302	559
field0009.jpg	991	1810	NUCLEUS	train	311	568
field0009.jpg	1363	1843	KINETOPLAST	train	428	578
field0009.jpg	1393	1873	NUCLEUS	train	437	588
field0009.jpg	1900	1717	KINETOPLAST_CELL_BODY	train	596	539
field0009.jpg	1967	1703	NUCLEUS	train	617	534
field0010.jpg	2011	1284	KINETOPLAST	train	631	403
field0010.jpg	1968	1255	NUCLEUS	train	617	394
field0010.jpg	1365	1913	KINETOPLAST	train	428	600
field0010.jpg	1374	1874	NUCLEUS	train	431	588
field0010.jpg	1346	2206	KINETOPLAST	train	422	692
field0010.jpg	1363	2150	NUCLEUS_CELL_BODY	train	428	675
field0011.jpg	437	1491	KINETOPLAST	train	137	468
field0011.jpg	485	1504	NUCLEUS	train	152	472
field0011.jpg	1300	1519	KINETOPLAST	train	408	477
field0011.jpg	1315	1565	NUCLEUS_CELL_BODY	train	413	491
field0011.jpg	1272	2017	KINETOPLAST	train	399	633
field0011.jpg	1322	2030	NUCLEUS_CELL_BODY	train	415	637
field0011.jpg	934	2542	KINETOPLAST	train	293	797
field0011.jpg	897	2580	NUCLEUS	train	281	809
field0012.jpg	606	1073	KINETOPLAST	train	190	337
field0012.jpg	593	1107	NUCLEUS	train	186	347
field0012.jpg	1006	2092	T_CRUZI	train	316	656
field0014.jpg	1484	1231	T_CRUZI	train	466	386
field0014.jpg	504	2018	KINETOPLAST	train	158	633
field0014.jpg	459	2001	NUCLEUS	train	144	628
field0014.jpg	1372	2244	KINETOPLAST_CELL_BODY	train	430	704
field0014.jpg	1376	2294	NUCLEUS_CELL_BODY	train	432	720
field0014.jpg	1144	2170	KINETOPLAST	train	359	681
field0014.jpg	1109	2213	NUCLEUS	train	348	694
field0014.jpg	1132	2544	KINETOPLAST	train	355	798
field0014.jpg	1142	2582	NUCLEUS	train	358	810
field0014.jpg	1129	2541	KINETOPLAST	train	354	797
field0014.jpg	1139	2584	NUCLEUS	train	357	811
field0014.jpg	2091	1744	KINETOPLAST	train	656	547
field0014.jpg	2136	1750	NUCLEUS	train	670	549
field0014.jpg	1798	1390	KINETOPLAST	train	564	436
field0014.jpg	1833	1423	NUCLEUS	train	575	446
field0015.jpg	749	1822	KINETOPLAST	train	235	572
field0015.jpg	785	1812	NUCLEUS	train	246	568
field0015.jpg	1078	2053	KINETOPLAST	train	338	644
field0015.jpg	1121	2044	NUCLEUS	train	352	641
field0016.jpg	548	1373	KINETOPLAST	train	172	431
field0016.jpg	604	1379	NUCLEUS	train	189	433
field0016.jpg	1912	1905	KINETOPLAST	train	600	598
field0016.jpg	1953	1881	NUCLEUS	train	613	590
field0017.jpg	1039	1633	KINETOPLAST	train	326	512
field0017.jpg	1074	1629	NUCLEUS	train	337	511
field0017.jpg	546	1999	KINETOPLAST	train	171	627
field0017.jpg	566	1954	NUCLEUS	train	178	613
field0017.jpg	348	2224	NUCLEUS	train	109	698
field0017.jpg	323	2250	KINETOPLAST	train	101	706
field0017.jpg	1464	1932	KINETOPLAST	train	459	606
field0017.jpg	1446	1965	NUCLEUS	train	454	616
field0017.jpg	1721	2627	KINETOPLAST	train	540	824
field0017.jpg	1767	2666	NUCLEUS	train	554	836
field0018.jpg	896	2437	KINETOPLAST	train	199	542
field0018.jpg	848	2410	NUCLEUS	train	188	536
field0019.jpg	1303	1051	KINETOPLAST	train	290	234
field0019.jpg	1039	2346	KINETOPLAST	train	231	521
field0019.jpg	1095	2281	NUCLEUS	train	243	507
field0019.jpg	1860	2611	KINETOPLAST	train	413	580
field0019.jpg	1941	2607	NUCLEUS	train	431	579
field0019.jpg	1471	2960	KINETOPLAST	train	327	658
field0019.jpg	1440	2930	NUCLEUS	train	320	651
field0019.jpg	1653	3581	KINETOPLAST	train	367	796
field0019.jpg	1667	3499	NUCLEUS	train	370	778
field0019.jpg	2321	3797	KINETOPLAST	train	516	844
field0019.jpg	1648	3578	KINETOPLAST	train	366	795
field0019.jpg	1667	3501	NUCLEUS	train	370	778
field0019.jpg	1319	1009	NUCLEUS	train	293	224
field0019.jpg	2308	3736	NUCLEUS	train	513	830
field0020.jpg	158	1330	KINETOPLAST	train	50	417
field0020.jpg	210	1337	NUCLEUS_CELL_BODY	train	66	419
field0020.jpg	364	1749	KINETOPLAST	train	114	549
field0020.jpg	365	1676	NUCLEUS	train	115	526
field0020.jpg	1399	1437	KINETOPLAST	train	439	451
field0020.jpg	1848	1857	NUCLEUS	train	580	583
field0020.jpg	1161	1572	KINETOPLAST	train	364	493
field0020.jpg	1180	1541	NUCLEUS_CELL_BODY	train	370	483
field0020.jpg	1354	1436	NUCLEUS_CELL_BODY	train	425	451
field0020.jpg	1100	1854	T_CRUZI	train	345	582
field0020.jpg	1084	2144	KINETOPLAST_CELL_BODY	train	340	673
field0020.jpg	1044	2115	NUCLEUS_CELL_BODY	train	328	664
field0020.jpg	1855	1637	KINETOPLAST	train	582	514
field0020.jpg	1819	1806	KINETOPLAST	train	571	567
field0020.jpg	1875	1682	NUCLEUS	train	588	528
field0020.jpg	1861	1772	NUCLEUS_CELL_BODY	train	584	556
field0020.jpg	1928	1988	NUCLEUS	train	605	624
field0021.jpg	485	2187	KINETOPLAST	train	108	486
field0021.jpg	504	2237	NUCLEUS	train	112	497
field0021.jpg	858	2635	KINETOPLAST	train	191	586
field0021.jpg	912	2696	NUCLEUS	train	203	599
field0021.jpg	2000	2749	NUCLEUS	train	444	611
field0021.jpg	1993	2816	KINETOPLAST	train	443	626
field0021.jpg	1749	3121	KINETOPLAST	train	389	694
field0021.jpg	1661	3109	NUCLEUS_CELL_BODY	train	369	691
field0021.jpg	783	3257	KINETOPLAST	train	174	724
field0021.jpg	712	3266	NUCLEUS	train	158	726
field0022.jpg	813	2182	NUCLEUS	train	255	685
field0022.jpg	892	2105	NUCLEUS	train	280	660
field0022.jpg	284	1404	NUCLEUS	train	89	440
field0022.jpg	1060	2145	NUCLEUS	train	333	673
field0023.jpg	1798	2398	KINETOPLAST	train	400	533
field0023.jpg	1715	2429	NUCLEUS	train	381	540
field0023.jpg	3017	1976	KINETOPLAST	train	670	439
field0023.jpg	3100	1983	NUCLEUS	train	689	441
field0023.jpg	2935	2776	KINETOPLAST	train	652	617
field0023.jpg	2192	3388	NUCLEUS	train	487	753
field0023.jpg	2254	3419	KINETOPLAST	train	501	760
field0023.jpg	1203	3169	KINETOPLAST	train	267	704
field0023.jpg	1257	3149	NUCLEUS_CELL_BODY	train	279	700
field0023.jpg	2760	2287	NUCLEUS	train	613	508
field0023.jpg	2978	2825	NUCLEUS	train	662	628
field0023.jpg	82	2208	NUCLEUS	train	18	491
field0023.jpg	2550	3044	NUCLEUS	train	567	676
field0024.jpg	1365	745	T_CRUZI	train	428	234
field0024.jpg	1824	1562	T_CRUZI	train	572	490
field0024.jpg	657	1952	KINETOPLAST	train	206	612
field0024.jpg	670	1986	NUCLEUS	train	210	623
field0024.jpg	678	2105	NUCLEUS_CELL_BODY	train	213	660
field0024.jpg	643	2089	KINETOPLAST	train	202	655
field0024.jpg	1235	2401	KINETOPLAST_CELL_BODY	train	387	753
field0024.jpg	1288	2377	NUCLEUS	train	404	746
field0024.jpg	760	2730	KINETOPLAST	train	238	856
field0024.jpg	729	2689	NUCLEUS	train	229	844
field0025.jpg	1236	1347	KINETOPLAST	train	388	423
field0025.jpg	1224	1384	NUCLEUS	train	384	434
field0025.jpg	531	2169	KINETOPLAST_CELL_BODY	train	167	680
field0025.jpg	490	2166	NUCLEUS	train	154	680
field0025.jpg	1450	2395	KINETOPLAST	train	455	751
field0025.jpg	1471	2431	NUCLEUS_CELL_BODY	train	461	763
field0027.jpg	1650	987	KINETOPLAST	train	367	219
field0027.jpg	1174	1005	KINETOPLAST	train	261	223
field0027.jpg	1232	1058	NUCLEUS	train	274	235
field0027.jpg	1585	2552	KINETOPLAST	train	352	567
field0027.jpg	1616	2617	NUCLEUS	train	359	582
field0027.jpg	716	3318	KINETOPLAST	train	159	737
field0027.jpg	728	3408	NUCLEUS	train	162	757
field0028.jpg	851	1326	KINETOPLAST	train	267	416
field0028.jpg	851	1343	KINETOPLAST	train	267	421
field0028.jpg	834	1295	NUCLEUS	train	262	406
field0028.jpg	871	1386	NUCLEUS	train	273	435
field0028.jpg	558	1611	KINETOPLAST_CELL_BODY	train	175	505
field0028.jpg	527	1630	NUCLEUS	train	165	511
field0028.jpg	842	2109	KINETOPLAST	train	264	662
field0028.jpg	822	2056	NUCLEUS	train	258	645
field0028.jpg	1772	1875	KINETOPLAST	train	556	588
field0028.jpg	1790	1934	NUCLEUS	train	562	607
field0029.jpg	448	1281	KINETOPLAST	train	141	402
field0029.jpg	429	1244	NUCLEUS	train	135	390
field0029.jpg	762	1532	KINETOPLAST	train	239	481
field0029.jpg	760	1572	NUCLEUS	train	238	493
field0029.jpg	1127	1457	KINETOPLAST_CELL_BODY	train	354	457
field0029.jpg	1119	1511	NUCLEUS_CELL_BODY	train	351	474
field0029.jpg	1774	1591	KINETOPLAST	train	557	499
field0029.jpg	1758	1536	NUCLEUS	train	552	482
field0029.jpg	1711	2053	KINETOPLAST	train	537	644
field0029.jpg	1645	2070	NUCLEUS	train	516	649
field0030.jpg	1990	1756	KINETOPLAST_CELL_BODY	train	624	551
field0030.jpg	1946	1791	NUCLEUS	train	611	562
field0032.jpg	545	1068	KINETOPLAST	train	171	335
field0032.jpg	575	1030	NUCLEUS	train	180	323
field0032.jpg	398	1583	T_CRUZI	train	125	497
field0032.jpg	185	1731	KINETOPLAST	train	58	543
field0032.jpg	236	1728	NUCLEUS_CELL_BODY	train	74	542
field0032.jpg	1294	1622	KINETOPLAST	train	406	509
field0032.jpg	1253	1650	NUCLEUS	train	393	518
field0032.jpg	643	2277	KINETOPLAST	train	202	714
field0032.jpg	646	2240	NUCLEUS	train	203	703
field0032.jpg	697	2600	NUCLEUS	train	219	816
field0032.jpg	728	2561	KINETOPLAST	train	228	803
field0033.jpg	1954	3734	NUCLEUS	train	434	830
field0033.jpg	1025	2876	NUCLEUS	train	228	639
field0033.jpg	2972	2434	NUCLEUS	train	660	541
field0034.jpg	1100	1591	KINETOPLAST	train	244	354
field0034.jpg	1141	1522	NUCLEUS	train	254	338
field0034.jpg	622	1797	KINETOPLAST	train	138	399
field0034.jpg	560	1782	NUCLEUS	train	124	396
field0034.jpg	1244	2577	KINETOPLAST	train	276	573
field0034.jpg	1202	2603	NUCLEUS	train	267	578
field0034.jpg	1213	2989	KINETOPLAST	train	270	664
field0034.jpg	1279	2935	NUCLEUS_CELL_BODY	train	284	652
field0034.jpg	2313	1764	KINETOPLAST	train	514	392
field0034.jpg	2296	1701	NUCLEUS_CELL_BODY	train	510	378
field0034.jpg	1950	2260	KINETOPLAST	train	433	502
field0034.jpg	1987	2315	NUCLEUS	train	442	514
field0034.jpg	2580	2775	KINETOPLAST	train	573	617
field0034.jpg	2531	2731	NUCLEUS	train	562	607
field0035.jpg	622	934	KINETOPLAST	train	195	293
field0035.jpg	651	960	NUCLEUS	train	204	301
field0035.jpg	1334	846	KINETOPLAST	train	419	265
field0035.jpg	1339	905	NUCLEUS	train	420	284
field0035.jpg	1004	1918	KINETOPLAST	train	315	602
field0035.jpg	1007	1864	NUCLEUS_CELL_BODY	train	316	585
field0035.jpg	445	1630	KINETOPLAST	train	140	511
field0035.jpg	486	1629	NUCLEUS	train	152	511
field0035.jpg	991	2531	KINETOPLAST_CELL_BODY	train	311	794
field0035.jpg	1052	2522	NUCLEUS_CELL_BODY	train	330	791
field0035.jpg	2084	2028	KINETOPLAST	train	654	636
field0035.jpg	2123	2052	NUCLEUS	train	666	644
field0036.jpg	1889	1832	KINETOPLAST	train	420	407
field0036.jpg	487	2322	KINETOPLAST	train	108	516
field0036.jpg	1185	2746	KINETOPLAST	train	263	610
field0036.jpg	1247	2732	NUCLEUS	train	277	607
field0036.jpg	1785	2481	NUCLEUS	train	397	551
field0036.jpg	1857	2518	KINETOPLAST	train	413	560
field0036.jpg	2250	2499	KINETOPLAST	train	500	555
field0036.jpg	2281	2557	NUCLEUS	train	507	568
field0036.jpg	1669	3580	KINETOPLAST	train	371	796
field0036.jpg	1637	3615	NUCLEUS	train	364	803
field0036.jpg	1434	1237	NUCLEUS	train	319	275
field0036.jpg	514	2290	NUCLEUS	train	114	509
field0036.jpg	1831	1787	NUCLEUS	train	407	397
field0036.jpg	498	3070	NUCLEUS	train	111	682
field0037.jpg	1545	1783	KINETOPLAST	train	343	396
field0037.jpg	1464	1791	NUCLEUS	train	325	398
field0037.jpg	1511	1902	KINETOPLAST	train	336	423
field0037.jpg	1553	1943	NUCLEUS	train	345	432
field0037.jpg	1418	2116	KINETOPLAST	train	315	470
field0037.jpg	1390	2177	NUCLEUS	train	309	484
field0037.jpg	1445	2924	KINETOPLAST	train	321	650
field0037.jpg	1491	2961	NUCLEUS	train	331	658
field0037.jpg	2446	3499	KINETOPLAST	train	544	778
field0037.jpg	3093	2823	NUCLEUS	train	687	627
field0037.jpg	2400	3465	NUCLEUS	train	533	770
field0038.jpg	2844	1835	KINETOPLAST	train	632	408
field0038.jpg	2892	1781	NUCLEUS	train	643	396
field0038.jpg	527	2415	KINETOPLAST	train	117	537
field0038.jpg	545	2354	NUCLEUS	train	121	523
field0038.jpg	1274	2528	KINETOPLAST	train	283	562
field0038.jpg	1223	2693	KINETOPLAST	train	272	598
field0038.jpg	1588	2839	KINETOPLAST	train	353	631
field0038.jpg	1628	2781	NUCLEUS	train	362	618
field0038.jpg	2847	1834	KINETOPLAST	train	633	408
field0038.jpg	2893	1781	NUCLEUS	train	643	396
field0039.jpg	858	1665	KINETOPLAST	train	269	522
field0039.jpg	896	1694	NUCLEUS_CELL_BODY	train	281	531
field0039.jpg	635	2219	KINETOPLAST	train	199	696
field0039.jpg	629	2265	NUCLEUS	train	197	711
field0039.jpg	227	2219	KINETOPLAST	train	71	696
field0039.jpg	175	2188	NUCLEUS	train	55	686
field0040.jpg	1593	1968	KINETOPLAST	train	354	437
field0040.jpg	1632	1962	NUCLEUS	train	363	436
field0040.jpg	1549	3676	KINETOPLAST	train	344	817
field0040.jpg	1487	3643	NUCLEUS	train	330	810
field0041.jpg	1566	1157	KINETOPLAST	train	491	363
field0041.jpg	1549	1098	NUCLEUS	train	486	344
field0041.jpg	1531	1132	NUCLEUS	train	480	355
field0041.jpg	1530	1100	KINETOPLAST	train	480	345
field0041.jpg	1081	1838	KINETOPLAST	train	339	577
field0041.jpg	1048	1840	NUCLEUS	train	329	577
field0042.jpg	899	1699	KINETOPLAST	train	200	378
field0042.jpg	885	1768	NUCLEUS	train	197	393
field0042.jpg	1687	1616	KINETOPLAST	train	375	359
field0042.jpg	1651	1599	NUCLEUS	train	367	355
field0042.jpg	1970	1925	KINETOPLAST	train	438	428
field0042.jpg	2046	1915	NUCLEUS	train	455	426
field0042.jpg	1434	2604	KINETOPLAST	train	319	579
field0042.jpg	1499	2551	NUCLEUS_CELL_BODY	train	333	567
field0042.jpg	1273	2947	KINETOPLAST	train	283	655
field0042.jpg	1367	2983	NUCLEUS_CELL_BODY	train	304	663
field0042.jpg	2469	2902	KINETOPLAST	train	549	645
field0042.jpg	2436	2858	NUCLEUS	train	541	635
field0043.jpg	2325	1487	KINETOPLAST	train	517	330
field0043.jpg	2368	1457	NUCLEUS	train	526	324
field0043.jpg	978	1934	KINETOPLAST	train	217	430
field0043.jpg	1017	1989	NUCLEUS	train	226	442
field0043.jpg	2440	2520	NUCLEUS	train	542	560
field0043.jpg	2408	2564	KINETOPLAST	train	535	570
field0043.jpg	1223	2317	KINETOPLAST	train	272	515
field0043.jpg	1278	2325	NUCLEUS	train	284	517
field0043.jpg	2186	3096	KINETOPLAST	train	486	688
field0043.jpg	2238	3115	NUCLEUS	train	497	692
field0043.jpg	2461	3721	NUCLEUS	train	547	827
field0043.jpg	2952	1752	NUCLEUS	train	656	389
field0043.jpg	1533	2742	NUCLEUS	train	341	609
field0044.jpg	1173	917	NUCLEUS	train	261	204
field0044.jpg	697	2191	NUCLEUS	train	155	487
field0044.jpg	796	2186	KINETOPLAST	train	177	486
field0044.jpg	1850	3278	KINETOPLAST	train	411	728
field0044.jpg	1877	3316	NUCLEUS	train	417	737
field0045.jpg	738	1180	KINETOPLAST	train	232	370
field0045.jpg	786	1195	NUCLEUS	train	247	375
field0045.jpg	1408	1742	KINETOPLAST_CELL_BODY	train	442	547
field0045.jpg	1381	1810	NUCLEUS_CELL_BODY	train	433	568
field0045.jpg	1024	2121	KINETOPLAST	train	321	665
field0045.jpg	1048	2160	NUCLEUS_CELL_BODY	train	329	678
field0045.jpg	1405	1743	KINETOPLAST_CELL_BODY	train	441	547
field0045.jpg	1378	1812	NUCLEUS_CELL_BODY	train	432	568
field0045.jpg	1515	2595	KINETOPLAST	train	475	814
field0045.jpg	1938	1817	KINETOPLAST	train	608	570
field0045.jpg	1917	1839	NUCLEUS	train	601	577
field0045.jpg	530	2110	NUCLEUS	train	166	662
field0045.jpg	1570	2647	NUCLEUS	train	493	830
field0045.jpg	1574	1316	NUCLEUS	train	494	413
field0046.jpg	2044	1325	KINETOPLAST_CELL_BODY	train	641	416
field0046.jpg	2019	1350	NUCLEUS	train	633	424
field0046.jpg	961	1561	KINETOPLAST	train	301	490
field0046.jpg	961	1514	NUCLEUS	train	301	475
field0046.jpg	2038	1325	KINETOPLAST_CELL_BODY	train	639	416
field0046.jpg	2012	1350	NUCLEUS	train	631	424
field0046.jpg	1556	1925	KINETOPLAST	train	488	604
field0046.jpg	1569	1952	NUCLEUS	train	492	612
field0046.jpg	951	2159	KINETOPLAST_CELL_BODY	train	298	677
field0046.jpg	892	2162	NUCLEUS_CELL_BODY	train	280	678
field0047.jpg	971	1130	KINETOPLAST	train	305	355
field0047.jpg	1020	1097	NUCLEUS	train	320	344
field0047.jpg	622	1349	KINETOPLAST	train	195	423
field0047.jpg	626	1317	NUCLEUS	train	196	413
field0047.jpg	970	1128	KINETOPLAST	train	304	354
field0047.jpg	1025	1099	NUCLEUS	train	322	345
field0047.jpg	1893	1511	KINETOPLAST_CELL_BODY	train	594	474
field0047.jpg	1857	1482	NUCLEUS	train	583	465
field0047.jpg	1899	2031	KINETOPLAST	train	596	637
field0047.jpg	1894	2057	NUCLEUS	train	594	645
field0047.jpg	1555	2320	KINETOPLAST	train	488	728
field0047.jpg	1550	2355	NUCLEUS	train	486	739
field0048.jpg	1596	1487	KINETOPLAST	train	355	330
field0048.jpg	1623	1439	NUCLEUS	train	361	320
field0048.jpg	1231	1781	KINETOPLAST	train	274	396
field0048.jpg	1208	1719	NUCLEUS	train	268	382
field0048.jpg	3184	2242	KINETOPLAST	train	708	498
field0048.jpg	2869	2969	KINETOPLAST	train	638	660
field0048.jpg	2857	2873	NUCLEUS	train	635	638
field0048.jpg	1552	3836	KINETOPLAST	train	345	852
field0048.jpg	3173	2304	NUCLEUS	train	705	512
field0048.jpg	632	3426	NUCLEUS	train	140	761
field0048.jpg	1500	3840	NUCLEUS	train	333	853
field0049.jpg	1337	1575	KINETOPLAST	train	297	350
field0049.jpg	1345	1616	NUCLEUS	train	299	359
field0049.jpg	1551	2329	KINETOPLAST	train	345	518
field0049.jpg	1599	2305	NUCLEUS	train	355	512
field0049.jpg	2170	2478	NUCLEUS	train	482	551
field0049.jpg	2181	2536	KINETOPLAST	train	485	564
field0049.jpg	1443	2838	KINETOPLAST	train	321	631
field0049.jpg	1483	2819	NUCLEUS	train	330	626
field0049.jpg	942	3804	NUCLEUS	train	209	845
field0049.jpg	903	3824	KINETOPLAST	train	201	850
field0049.jpg	2128	3541	KINETOPLAST	train	473	787
field0049.jpg	2188	3569	NUCLEUS	train	486	793
field0050.jpg	588	1341	KINETOPLAST	train	131	298
field0050.jpg	591	1419	NUCLEUS	train	131	315
field0050.jpg	572	1481	NUCLEUS	train	127	329
field0050.jpg	627	1462	KINETOPLAST	train	139	325
field0050.jpg	1303	1583	KINETOPLAST	train	290	352
field0050.jpg	1342	1564	NUCLEUS	train	298	348
field0050.jpg	144	2466	KINETOPLAST	train	32	548
field0050.jpg	56	2477	NUCLEUS	train	12	550
field0050.jpg	822	2393	KINETOPLAST	train	183	532
field0050.jpg	793	2460	NUCLEUS_CELL_BODY	train	176	547
field0050.jpg	968	2642	KINETOPLAST_CELL_BODY	train	215	587
field0050.jpg	932	2572	NUCLEUS	train	207	572
field0050.jpg	2416	2553	KINETOPLAST	train	537	567
field0050.jpg	2418	2653	NUCLEUS	train	537	590
field0050.jpg	1750	2720	KINETOPLAST	train	389	604
field0050.jpg	1811	2745	NUCLEUS	train	402	610
field0050.jpg	1844	3053	KINETOPLAST	train	410	678
field0050.jpg	1807	3086	NUCLEUS	train	402	686
field0050.jpg	1937	3123	KINETOPLAST	train	430	694
field0050.jpg	1937	3123	KINETOPLAST	train	430	694
field0050.jpg	1951	3196	NUCLEUS	train	434	710
field0050.jpg	524	3674	KINETOPLAST	train	116	816
field0050.jpg	568	3715	NUCLEUS	train	126	826
field0050.jpg	1154	3888	KINETOPLAST_CELL_BODY	train	256	864
field0050.jpg	1213	3861	NUCLEUS	train	270	858
field0051.jpg	628	1823	KINETOPLAST	train	140	405
field0051.jpg	697	1834	NUCLEUS	train	155	408
field0051.jpg	1790	3007	KINETOPLAST	train	398	668
field0051.jpg	1761	3074	NUCLEUS	train	391	683
field0052.jpg	1091	1592	KINETOPLAST	train	242	354
field0052.jpg	969	1632	NUCLEUS	train	215	363
field0052.jpg	982	1890	KINETOPLAST	train	218	420
field0052.jpg	955	1813	NUCLEUS	train	212	403
field0052.jpg	1468	2014	KINETOPLAST	train	326	448
field0052.jpg	1521	2071	NUCLEUS	train	338	460
field0052.jpg	1828	2259	KINETOPLAST	train	406	502
field0052.jpg	1851	2207	NUCLEUS_CELL_BODY	train	411	490
field0052.jpg	625	2454	KINETOPLAST	train	139	545
field0052.jpg	560	2470	NUCLEUS_CELL_BODY	train	124	549
field0052.jpg	1123	2902	KINETOPLAST	train	250	645
field0052.jpg	1087	2963	NUCLEUS_CELL_BODY	train	242	658
field0053.jpg	2162	1569	KINETOPLAST	train	678	492
field0053.jpg	2109	1564	NUCLEUS	train	662	491
field0053.jpg	1613	1856	KINETOPLAST	train	506	582
field0053.jpg	1623	1822	NUCLEUS	train	509	572
field0053.jpg	1844	2043	KINETOPLAST	train	579	641
field0053.jpg	1617	1814	NUCLEUS	train	507	569
field0053.jpg	1845	2045	KINETOPLAST	train	579	642
field0053.jpg	1860	2079	NUCLEUS	train	584	652
field0053.jpg	1493	2002	KINETOPLAST	train	468	628
field0053.jpg	1475	1950	NUCLEUS	train	463	612
field0053.jpg	2166	1566	KINETOPLAST	train	680	491
field0053.jpg	2109	1566	NUCLEUS	train	662	491
field0053.jpg	1847	2045	KINETOPLAST	train	579	642
field0053.jpg	1869	2081	NUCLEUS	train	586	653
field0053.jpg	1166	2272	KINETOPLAST_CELL_BODY	train	366	713
field0053.jpg	1178	2331	NUCLEUS	train	370	731
field0053.jpg	586	1790	KINETOPLAST	train	184	562
field0053.jpg	603	1743	NUCLEUS	train	189	547
field0053.jpg	823	1987	KINETOPLAST	train	258	623
field0053.jpg	817	1952	NUCLEUS	train	256	612
field0053.jpg	643	2528	KINETOPLAST	train	202	793
field0053.jpg	679	2506	NUCLEUS	train	213	786
field0053.jpg	541	2055	KINETOPLAST	train	170	645
field0054.jpg	638	1825	KINETOPLAST	train	142	406
field0054.jpg	605	1748	NUCLEUS	train	134	388
field0054.jpg	1969	2132	KINETOPLAST	train	438	474
field0054.jpg	2190	2186	KINETOPLAST	train	487	486
field0054.jpg	2238	2142	NUCLEUS	train	497	476
field0054.jpg	2744	1939	KINETOPLAST	train	610	431
field0054.jpg	2692	1985	NUCLEUS	train	598	441
field0054.jpg	1995	2092	NUCLEUS	train	443	465
field0054.jpg	2621	1584	NUCLEUS	train	582	352
field0055.jpg	1038	2156	KINETOPLAST_CELL_BODY	train	326	676
field0055.jpg	1010	2123	NUCLEUS_CELL_BODY	train	317	666
field0055.jpg	1116	2178	NUCLEUS_CELL_BODY	train	350	683
field0055.jpg	1154	2143	KINETOPLAST	train	362	672
field0055.jpg	1314	2099	KINETOPLAST	train	412	659
field0055.jpg	1268	2067	NUCLEUS	train	398	648
field0056.jpg	1050	1854	KINETOPLAST	train	233	412
field0056.jpg	1081	1936	NUCLEUS	train	240	430
field0056.jpg	1245	2483	NUCLEUS	train	277	552
field0056.jpg	1243	2570	KINETOPLAST	train	276	571
field0056.jpg	989	3072	KINETOPLAST	train	220	683
field0056.jpg	1036	3036	NUCLEUS	train	230	675
field0056.jpg	2116	3442	NUCLEUS	train	470	765
field0057.jpg	462	1448	KINETOPLAST	train	145	454
field0057.jpg	417	1465	NUCLEUS	train	131	460
field0057.jpg	1638	1543	KINETOPLAST	train	514	484
field0057.jpg	1679	1535	NUCLEUS	train	527	482
field0057.jpg	257	1952	KINETOPLAST	train	81	612
field0057.jpg	225	1994	NUCLEUS	train	71	626
field0057.jpg	802	2618	KINETOPLAST	train	252	821
field0057.jpg	826	2566	NUCLEUS	train	259	805
field0058.jpg	973	1945	KINETOPLAST	train	216	432
field0058.jpg	892	1926	NUCLEUS	train	198	428
field0060.jpg	1041	2240	KINETOPLAST	train	231	498
field0060.jpg	1057	2176	NUCLEUS	train	235	484
field0060.jpg	835	2353	KINETOPLAST	train	186	523
field0060.jpg	789	2307	NUCLEUS	train	175	513
field0060.jpg	348	2454	KINETOPLAST	train	77	545
field0060.jpg	315	2513	NUCLEUS	train	70	558
field0060.jpg	971	2781	KINETOPLAST	train	216	618
field0060.jpg	1022	2825	NUCLEUS	train	227	628
field0060.jpg	1168	3412	KINETOPLAST	train	260	758
field0060.jpg	1217	3372	NUCLEUS	train	270	749
field0061.jpg	1536	993	KINETOPLAST_CELL_BODY	train	482	312
field0061.jpg	1560	1025	NUCLEUS	train	489	322
field0061.jpg	651	982	KINETOPLAST	train	204	308
field0061.jpg	661	1019	NUCLEUS	train	207	320
field0061.jpg	905	1418	T_CRUZI	train	284	445
field0061.jpg	1265	1472	KINETOPLAST_CELL_BODY	train	397	462
field0061.jpg	1295	1461	NUCLEUS	train	406	458
field0061.jpg	1596	1508	KINETOPLAST_CELL_BODY	train	501	473
field0061.jpg	1608	1542	NUCLEUS	train	504	484
field0061.jpg	811	2467	KINETOPLAST	train	254	774
field0061.jpg	839	2419	NUCLEUS	train	263	759
field0062.jpg	1393	1164	KINETOPLAST	train	310	259
field0062.jpg	1320	1123	NUCLEUS	train	293	250
field0062.jpg	1641	1221	KINETOPLAST	train	365	271
field0062.jpg	1646	1273	NUCLEUS	train	366	283
field0062.jpg	547	2646	KINETOPLAST	train	122	588
field0062.jpg	536	2593	NUCLEUS	train	119	576
field0062.jpg	1037	3287	KINETOPLAST	train	230	730
field0062.jpg	1130	3338	NUCLEUS_CELL_BODY	train	251	742
field0064.jpg	607	1256	KINETOPLAST	train	190	394
field0064.jpg	555	1232	NUCLEUS	train	174	387
field0064.jpg	1705	1400	NUCLEUS	train	535	439
field0064.jpg	1705	1357	KINETOPLAST	train	535	426
field0064.jpg	969	1628	KINETOPLAST	train	304	511
field0064.jpg	1031	1614	NUCLEUS	train	323	506
field0064.jpg	1028	1807	T_CRUZI	train	323	567
field0064.jpg	594	1919	T_CRUZI	train	186	602
field0064.jpg	1457	1830	KINETOPLAST_CELL_BODY	train	457	574
field0064.jpg	1437	1885	NUCLEUS_CELL_BODY	train	451	591
field0065.jpg	2098	2230	KINETOPLAST	train	466	496
field0065.jpg	2087	2154	NUCLEUS	train	464	479
field0065.jpg	2391	2265	KINETOPLAST	train	531	503
field0065.jpg	2306	2302	NUCLEUS_CELL_BODY	train	512	512
field0065.jpg	1615	2521	NUCLEUS	train	359	560
field0065.jpg	1602	2569	KINETOPLAST	train	356	571
field0065.jpg	1128	2856	KINETOPLAST	train	251	635
field0065.jpg	1061	2833	NUCLEUS_CELL_BODY	train	236	630
field0066.jpg	817	782	KINETOPLAST_CELL_BODY	train	256	245
field0066.jpg	1376	1307	KINETOPLAST_CELL_BODY	train	432	410
field0066.jpg	1363	1260	NUCLEUS_CELL_BODY	train	428	395
field0066.jpg	1966	1130	KINETOPLAST_CELL_BODY	train	617	355
field0066.jpg	1973	1098	NUCLEUS	train	619	344
field0066.jpg	1885	1388	KINETOPLAST_CELL_BODY	train	591	435
field0066.jpg	1363	1270	NUCLEUS_CELL_BODY	train	428	398
field0066.jpg	1847	1366	NUCLEUS_CELL_BODY	train	579	429
field0066.jpg	1887	1387	KINETOPLAST_CELL_BODY	train	592	435
field0066.jpg	658	1890	T_CRUZI	train	206	593
field0066.jpg	1396	2081	KINETOPLAST_CELL_BODY	train	438	653
field0066.jpg	1415	2049	NUCLEUS	train	444	643
field0066.jpg	847	2857	KINETOPLAST	train	266	896
field0066.jpg	896	2887	NUCLEUS	train	281	906
field0066.jpg	1704	1788	NUCLEUS	train	535	561
field0067.jpg	1497	1863	NUCLEUS	train	333	414
field0067.jpg	1482	1941	KINETOPLAST	train	329	431
field0068.jpg	1688	1051	KINETOPLAST	train	375	234
field0068.jpg	1635	1078	NUCLEUS	train	363	240
field0068.jpg	1422	2051	KINETOPLAST	train	316	456
field0068.jpg	1374	2096	NUCLEUS	train	305	466
field0068.jpg	991	2399	NUCLEUS	train	220	533
field0068.jpg	1039	2410	KINETOPLAST	train	231	536
field0068.jpg	2575	2787	KINETOPLAST	train	572	619
field0068.jpg	2563	2717	NUCLEUS	train	570	604
field0069.jpg	1164	1529	NUCLEUS	train	365	480
field0069.jpg	969	1565	NUCLEUS	train	304	491
field0069.jpg	261	1551	NUCLEUS	train	82	487
field0069.jpg	241	1639	NUCLEUS_CELL_BODY	train	76	514
field0069.jpg	228	1729	NUCLEUS	train	72	542
field0069.jpg	310	1857	NUCLEUS_CELL_BODY	train	97	583
field0069.jpg	689	2259	NUCLEUS_CELL_BODY	train	216	709
field0069.jpg	1230	2325	NUCLEUS_CELL_BODY	train	386	729
field0069.jpg	973	1564	NUCLEUS	train	305	491
field0069.jpg	1163	1530	NUCLEUS	train	365	480
field0069.jpg	720	2538	NUCLEUS	train	226	796
field0070.jpg	1372	2117	KINETOPLAST	train	305	470
field0070.jpg	1440	2151	NUCLEUS_CELL_BODY	train	320	478
field0070.jpg	2647	2628	KINETOPLAST	train	588	584
field0070.jpg	2649	2675	NUCLEUS	train	589	594
field0070.jpg	2027	3178	NUCLEUS	train	450	706
field0070.jpg	1966	3103	KINETOPLAST	train	437	690
field0070.jpg	3058	3206	NUCLEUS	train	680	712
field0070.jpg	1815	3913	NUCLEUS	train	403	870
field0070.jpg	1009	1967	NUCLEUS	train	224	437
field0071.jpg	1795	2526	KINETOPLAST	train	399	561
field0071.jpg	1846	2575	NUCLEUS	train	410	572
field0071.jpg	3095	2889	KINETOPLAST	train	688	642
field0072.jpg	1440	1733	KINETOPLAST	train	320	385
field0072.jpg	1472	1763	NUCLEUS	train	327	392
field0072.jpg	1995	1799	NUCLEUS	train	443	400
field0072.jpg	2044	1766	KINETOPLAST	train	454	392
field0072.jpg	2190	2682	KINETOPLAST	train	487	596
field0072.jpg	2205	2763	NUCLEUS_CELL_BODY	train	490	614
field0072.jpg	1200	3588	NUCLEUS	train	267	797
field0072.jpg	1187	3544	KINETOPLAST	train	264	788
field0072.jpg	2769	3299	NUCLEUS	train	615	733
field0073.jpg	1082	1174	KINETOPLAST	train	339	368
field0073.jpg	1025	1204	NUCLEUS	train	322	378
field0073.jpg	999	1351	KINETOPLAST	train	313	424
field0073.jpg	981	1317	NUCLEUS	train	308	413
field0073.jpg	961	1480	NUCLEUS	train	301	464
field0073.jpg	897	1501	KINETOPLAST	train	281	471
field0073.jpg	295	1388	KINETOPLAST	train	93	435
field0073.jpg	239	1411	NUCLEUS	train	75	443
field0073.jpg	556	1996	KINETOPLAST	train	174	626
field0073.jpg	548	2042	NUCLEUS_CELL_BODY	train	172	641
field0073.jpg	1542	2397	NUCLEUS	train	484	752
field0073.jpg	1588	2391	KINETOPLAST	train	498	750
field0073.jpg	1608	1294	NUCLEUS	train	504	406
field0073.jpg	654	1654	NUCLEUS	train	205	519
field0073.jpg	298	2432	NUCLEUS	train	93	763
field0073.jpg	516	2148	NUCLEUS	train	162	674
field0074.jpg	1667	2363	KINETOPLAST	train	370	525
field0074.jpg	1712	2301	NUCLEUS	train	380	511
field0074.jpg	1940	2691	KINETOPLAST	train	431	598
field0074.jpg	1997	2716	NUCLEUS	train	444	604
field0074.jpg	1156	2975	NUCLEUS	train	257	661
field0074.jpg	1198	3044	KINETOPLAST	train	266	676
field0074.jpg	535	1997	KINETOPLAST	train	119	444
field0074.jpg	336	2704	NUCLEUS	train	75	601
field0074.jpg	392	3174	NUCLEUS	train	87	705
field0074.jpg	3096	2080	NUCLEUS	train	688	462
field0075.jpg	1118	1334	KINETOPLAST	train	351	419
field0075.jpg	1105	1303	NUCLEUS	train	347	409
field0075.jpg	793	1599	KINETOPLAST	train	249	502
field0075.jpg	831	1634	NUCLEUS	train	261	513
field0075.jpg	1201	2372	KINETOPLAST	train	377	744
field0075.jpg	1162	2408	NUCLEUS	train	365	755
field0076.jpg	665	1486	KINETOPLAST_CELL_BODY	train	209	466
field0076.jpg	1367	1998	NUCLEUS	train	429	627
field0076.jpg	1402	1976	KINETOPLAST	train	440	620
field0076.jpg	708	1495	NUCLEUS	train	222	469
field0077.jpg	1206	1712	KINETOPLAST_CELL_BODY	train	378	537
field0077.jpg	1179	1672	NUCLEUS_CELL_BODY	train	370	525
field0077.jpg	771	1937	KINETOPLAST	train	242	608
field0077.jpg	729	1930	NUCLEUS	train	229	605
field0077.jpg	718	2297	NUCLEUS_CELL_BODY	train	225	721
field0077.jpg	712	2327	KINETOPLAST	train	223	730
field0078.jpg	1034	1236	KINETOPLAST	train	324	388
field0078.jpg	1016	1269	NUCLEUS	train	319	398
field0078.jpg	894	1691	T_CRUZI	train	280	531
field0078.jpg	1434	2043	KINETOPLAST	train	450	641
field0078.jpg	1467	2011	NUCLEUS	train	460	631
field0078.jpg	1062	2163	NUCLEUS	train	333	679
field0078.jpg	1517	1531	KINETOPLAST	train	476	480
field0078.jpg	1591	1542	NUCLEUS_CELL_BODY	train	499	484
field0078.jpg	2087	1340	KINETOPLAST	train	655	420
field0078.jpg	2111	1390	NUCLEUS	train	662	436
field0079.jpg	664	1157	KINETOPLAST	train	208	363
field0079.jpg	709	1145	NUCLEUS	train	222	359
field0079.jpg	921	1282	NUCLEUS	train	289	402
field0079.jpg	869	1290	KINETOPLAST	train	273	405
field0079.jpg	1360	726	KINETOPLAST	train	427	228
field0079.jpg	1378	733	NUCLEUS	train	432	230
field0079.jpg	1867	1129	NUCLEUS	train	586	354
field0079.jpg	1904	1115	KINETOPLAST	train	597	350
field0079.jpg	1182	1658	KINETOPLAST	train	371	520
field0079.jpg	1186	1719	NUCLEUS	train	372	539
field0079.jpg	1018	2173	NUCLEUS	train	319	682
field0079.jpg	1051	2152	KINETOPLAST_CELL_BODY	train	330	675
field0079.jpg	1666	2520	NUCLEUS	train	523	791
field0080.jpg	1223	2137	KINETOPLAST	train	272	475
field0080.jpg	1216	2087	NUCLEUS	train	270	464
field0080.jpg	791	2879	NUCLEUS	train	176	640
field0080.jpg	871	2995	NUCLEUS	train	194	666
field0080.jpg	730	2923	KINETOPLAST	train	162	650
field0080.jpg	877	2928	KINETOPLAST	train	195	651
field0080.jpg	1214	2694	KINETOPLAST	train	270	599
field0080.jpg	1273	2766	NUCLEUS	train	283	615
field0080.jpg	1440	2980	NUCLEUS	train	320	662
field0080.jpg	1447	3070	KINETOPLAST	train	322	682
field0080.jpg	2231	2890	KINETOPLAST	train	496	642
field0080.jpg	1610	1471	NUCLEUS	train	358	327
field0081.jpg	923	1355	KINETOPLAST	train	205	301
field0081.jpg	924	1432	NUCLEUS	train	205	318
field0081.jpg	1298	2747	NUCLEUS_CELL_BODY	train	288	610
field0081.jpg	1381	2733	KINETOPLAST	train	307	607
field0081.jpg	1615	3071	KINETOPLAST	train	359	682
field0081.jpg	1653	3112	NUCLEUS	train	367	692
field0081.jpg	2228	2651	NUCLEUS	train	495	589
field0081.jpg	2301	2697	KINETOPLAST	train	511	599
field0082.jpg	1575	2030	KINETOPLAST	train	350	451
field0082.jpg	1526	2422	KINETOPLAST	train	339	538
field0082.jpg	1544	1990	NUCLEUS	train	343	442
field0082.jpg	1524	2370	NUCLEUS	train	339	527
field0083.jpg	772	1486	NUCLEUS	train	242	466
field0083.jpg	1070	1425	NUCLEUS	train	336	447
field0083.jpg	1411	1833	NUCLEUS	train	443	575
field0083.jpg	1391	1849	KINETOPLAST	train	436	580
field0083.jpg	1055	1452	KINETOPLAST	train	331	456
field0083.jpg	785	1520	KINETOPLAST	train	246	477
field0083.jpg	297	1360	NUCLEUS	train	93	427
field0084.jpg	1072	2935	KINETOPLAST	train	238	652
field0084.jpg	1912	2693	KINETOPLAST	train	425	598
field0084.jpg	1979	2764	NUCLEUS	train	440	614
field0084.jpg	2300	2849	NUCLEUS	train	511	633
field0084.jpg	2287	2787	KINETOPLAST	train	508	619
field0084.jpg	2223	3269	KINETOPLAST	train	494	726
field0084.jpg	2175	3311	NUCLEUS	train	483	736
field0084.jpg	1041	2893	NUCLEUS	train	231	643
field0085.jpg	642	1173	KINETOPLAST	train	201	368
field0085.jpg	584	1165	NUCLEUS	train	183	365
field0085.jpg	916	1965	NUCLEUS	train	287	616
field0085.jpg	875	1935	KINETOPLAST	train	275	607
field0085.jpg	1240	2447	KINETOPLAST	train	389	768
field0085.jpg	1236	2391	NUCLEUS	train	388	750
field0086.jpg	1336	835	KINETOPLAST	train	419	262
field0086.jpg	1739	996	KINETOPLAST	train	546	312
field0086.jpg	1753	937	NUCLEUS	train	550	294
field0086.jpg	624	1636	NUCLEUS	train	196	513
field0086.jpg	643	1575	KINETOPLAST	train	202	494
field0086.jpg	798	1635	KINETOPLAST_CELL_BODY	train	250	513
field0086.jpg	856	1659	NUCLEUS_CELL_BODY	train	269	520
field0086.jpg	1155	2614	NUCLEUS_CELL_BODY	train	362	820
field0086.jpg	1158	2659	KINETOPLAST	train	363	834
field0086.jpg	1324	2822	KINETOPLAST	train	415	885
field0086.jpg	1324	2874	NUCLEUS	train	415	902
field0086.jpg	1382	890	NUCLEUS	train	434	279
field0087.jpg	548	1370	KINETOPLAST	train	172	430
field0087.jpg	570	1361	NUCLEUS	train	179	427
field0087.jpg	608	1786	KINETOPLAST	train	191	560
field0087.jpg	642	1797	NUCLEUS	train	201	564
field0087.jpg	1315	1716	NUCLEUS	train	413	538
field0087.jpg	1311	1757	KINETOPLAST	train	411	551
field0087.jpg	816	2268	KINETOPLAST	train	256	712
field0087.jpg	839	2237	NUCLEUS	train	263	702
field0087.jpg	1140	2446	NUCLEUS	train	358	767
field0087.jpg	1102	2440	KINETOPLAST	train	346	765
field0087.jpg	815	2685	KINETOPLAST	train	256	842
field0087.jpg	822	2744	NUCLEUS_CELL_BODY	train	258	861
field0087.jpg	2146	1886	KINETOPLAST	train	673	592
field0087.jpg	2208	1893	NUCLEUS_CELL_BODY	train	693	594
field0088.jpg	2053	2349	KINETOPLAST	train	456	522
field0088.jpg	2010	2415	NUCLEUS	train	447	537
field0089.jpg	1784	1408	T_CRUZI	train	560	442
field0089.jpg	1196	2795	KINETOPLAST	train	375	877
field0089.jpg	1198	2739	NUCLEUS	train	376	859
field0090.jpg	2709	2075	KINETOPLAST	train	602	461
field0090.jpg	1976	2266	KINETOPLAST	train	439	504
field0090.jpg	2023	2256	NUCLEUS	train	450	501
field0090.jpg	1706	3222	KINETOPLAST	train	379	716
field0090.jpg	672	3303	KINETOPLAST	train	149	734
field0090.jpg	2602	2068	NUCLEUS	train	578	460
field0090.jpg	1636	3188	NUCLEUS	train	364	708
field0090.jpg	564	3274	NUCLEUS	train	125	728
field0091.jpg	1211	1023	KINETOPLAST	train	380	321
field0091.jpg	1241	1015	NUCLEUS	train	389	318
field0091.jpg	766	1331	NUCLEUS	train	240	418
field0091.jpg	752	1371	KINETOPLAST	train	236	430
field0091.jpg	544	1599	KINETOPLAST_CELL_BODY	train	171	502
field0091.jpg	568	1577	NUCLEUS_CELL_BODY	train	178	495
field0091.jpg	1621	1315	KINETOPLAST	train	509	413
field0091.jpg	1595	1350	NUCLEUS	train	500	424
field0091.jpg	1904	1979	NUCLEUS	train	597	621
field0091.jpg	1859	1958	KINETOPLAST	train	583	614
field0091.jpg	1407	2553	KINETOPLAST	train	441	801
field0091.jpg	1437	2522	NUCLEUS	train	451	791
field0091.jpg	204	2377	KINETOPLAST	train	64	746
field0091.jpg	234	2354	NUCLEUS	train	73	739
field0092.jpg	528	1134	NUCLEUS	train	166	356
field0092.jpg	524	1191	KINETOPLAST	train	164	374
field0092.jpg	1228	1128	T_CRUZI	train	385	354
field0092.jpg	1901	1036	KINETOPLAST_CELL_BODY	train	596	325
field0092.jpg	1851	1063	NUCLEUS	train	581	333
field0092.jpg	1061	1761	T_CRUZI	train	333	552
field0092.jpg	1407	1680	NUCLEUS_CELL_BODY	train	441	527
field0092.jpg	861	1943	T_CRUZI	train	270	610
field0092.jpg	530	2736	KINETOPLAST_CELL_BODY	train	166	858
field0092.jpg	467	2714	NUCLEUS	train	147	851
field0092.jpg	1189	2853	KINETOPLAST	train	373	895
field0092.jpg	1136	2855	NUCLEUS	train	356	896
field0092.jpg	1428	2691	NUCLEUS	train	448	844
field0092.jpg	1458	2667	KINETOPLAST	train	457	837
field0092.jpg	92	2250	NUCLEUS	train	29	706
field0092.jpg	806	1945	NUCLEUS	train	253	610
field0092.jpg	83	1407	NUCLEUS	train	26	441
field0093.jpg	2082	1697	KINETOPLAST	train	653	532
field0093.jpg	2074	1735	NUCLEUS	train	651	544
field0093.jpg	1205	2359	KINETOPLAST	train	378	740
field0093.jpg	1178	2326	NUCLEUS	train	370	730
field0093.jpg	1092	2381	KINETOPLAST	train	343	747
field0093.jpg	1117	2357	NUCLEUS	train	350	739
field0094.jpg	927	1398	KINETOPLAST	train	206	311
field0094.jpg	993	1431	NUCLEUS	train	221	318
field0094.jpg	1207	1794	T_CRUZI	train	268	399
field0094.jpg	1122	2023	KINETOPLAST_CELL_BODY	train	249	450
field0094.jpg	1138	2083	NUCLEUS	train	253	463
field0094.jpg	924	2475	NUCLEUS	train	205	550
field0094.jpg	1104	3616	NUCLEUS	train	245	804
field0094.jpg	2049	2532	NUCLEUS	train	455	563
field0094.jpg	1100	3219	NUCLEUS	train	244	715
field0095.jpg	1789	1935	KINETOPLAST	train	398	430
field0095.jpg	1766	2004	NUCLEUS	train	392	445
field0095.jpg	2503	1504	KINETOPLAST	train	556	334
field0095.jpg	2603	1399	KINETOPLAST	train	578	311
field0095.jpg	2173	2439	KINETOPLAST	train	483	542
field0095.jpg	2176	2387	NUCLEUS	train	484	530
field0095.jpg	643	3066	KINETOPLAST	train	143	681
field0095.jpg	741	3059	NUCLEUS_CELL_BODY	train	165	680
field0095.jpg	837	3257	KINETOPLAST_CELL_BODY	train	186	724
field0095.jpg	832	3196	NUCLEUS	train	185	710
field0095.jpg	122	1862	NUCLEUS	train	27	414
field0095.jpg	2274	3496	NUCLEUS	train	505	777
field0095.jpg	2604	3446	NUCLEUS	train	579	766
field0096.jpg	1558	886	KINETOPLAST	train	489	278
field0096.jpg	1509	911	NUCLEUS	train	473	286
field0096.jpg	1306	1949	NUCLEUS	train	410	611
field0096.jpg	1271	1937	KINETOPLAST	train	399	608
field0096.jpg	1400	2468	KINETOPLAST	train	439	774
field0096.jpg	1437	2477	NUCLEUS	train	451	777
field0096.jpg	977	2508	NUCLEUS	train	307	787
field0096.jpg	951	2472	KINETOPLAST	train	298	776
field0097.jpg	1116	2273	NUCLEUS	train	350	713
field0097.jpg	854	1440	NUCLEUS	train	268	452
field0097.jpg	1309	1870	NUCLEUS	train	411	587
field0097.jpg	604	886	NUCLEUS	train	189	278
field0097.jpg	1084	2258	KINETOPLAST	train	340	708
field0097.jpg	1270	1886	KINETOPLAST	train	398	592
field0097.jpg	880	1413	KINETOPLAST	train	276	443
field0097.jpg	620	952	KINETOPLAST	train	195	299
field0098.jpg	231	1395	T_CRUZI	train	72	438
field0098.jpg	508	1472	KINETOPLAST	train	159	462
field0098.jpg	516	1527	NUCLEUS_CELL_BODY	train	162	479
field0098.jpg	887	1609	KINETOPLAST_CELL_BODY	train	278	505
field0098.jpg	865	1644	NUCLEUS	train	271	516
field0098.jpg	1051	1727	KINETOPLAST_CELL_BODY	train	330	542
field0098.jpg	1025	1700	NUCLEUS	train	322	533
field0098.jpg	889	1808	KINETOPLAST_CELL_BODY	train	279	567
field0098.jpg	845	1834	NUCLEUS_CELL_BODY	train	265	575
field0098.jpg	903	2020	KINETOPLAST_CELL_BODY	train	283	634
field0098.jpg	934	2020	NUCLEUS	train	293	634
field0098.jpg	704	2506	NUCLEUS	train	221	786
field0099.jpg	1357	1431	NUCLEUS	train	302	318
field0099.jpg	1351	1352	KINETOPLAST	train	300	300
field0099.jpg	1809	1790	KINETOPLAST	train	402	398
field0099.jpg	1865	1715	NUCLEUS	train	414	381
field0099.jpg	1980	2692	KINETOPLAST	train	440	598
field0099.jpg	1943	2617	NUCLEUS	train	432	582
field0100.jpg	1049	1299	NUCLEUS	train	329	408
field0100.jpg	980	1315	KINETOPLAST	train	307	413
field0100.jpg	2114	1691	KINETOPLAST	train	663	531
field0100.jpg	2129	1724	NUCLEUS	train	668	541
field0100.jpg	2250	1835	NUCLEUS	train	706	576
field0100.jpg	928	2193	NUCLEUS	train	291	688
field0100.jpg	956	2228	KINETOPLAST	train	300	699
field0101.jpg	2385	2146	KINETOPLAST	train	530	477
field0101.jpg	2309	2116	NUCLEUS	train	513	470
field0101.jpg	1379	2185	NUCLEUS_CELL_BODY	train	306	486
field0101.jpg	1469	2187	KINETOPLAST	train	326	486
field0101.jpg	1692	2515	KINETOPLAST	train	376	559
field0101.jpg	1730	2547	NUCLEUS	train	384	566
field0101.jpg	2314	2125	NUCLEUS	train	514	472
field0101.jpg	2381	2147	KINETOPLAST	train	529	477
field0102.jpg	1268	1809	KINETOPLAST	train	282	402
field0102.jpg	1225	1838	NUCLEUS_CELL_BODY	train	272	408
field0102.jpg	1359	1969	KINETOPLAST	train	302	438
field0102.jpg	1228	1841	NUCLEUS_CELL_BODY	train	273	409
field0102.jpg	1356	1973	KINETOPLAST	train	301	438
field0102.jpg	1392	2026	NUCLEUS	train	309	450
field0102.jpg	1190	2965	KINETOPLAST	train	264	659
field0102.jpg	1208	3008	NUCLEUS	train	268	668
field0102.jpg	1128	3352	NUCLEUS	train	251	745
field0102.jpg	1076	3366	KINETOPLAST	train	239	748
field0102.jpg	1455	3212	KINETOPLAST	train	323	714
field0102.jpg	1496	3203	NUCLEUS	train	332	712
field0102.jpg	2059	3879	KINETOPLAST	train	458	862
field0102.jpg	2030	3228	KINETOPLAST	train	451	717
field0102.jpg	2080	3267	NUCLEUS	train	462	726
field0102.jpg	2709	2157	KINETOPLAST	train	602	479
field0102.jpg	2434	2108	KINETOPLAST	train	541	468
field0102.jpg	2254	2303	KINETOPLAST	train	501	512
field0102.jpg	2440	2598	KINETOPLAST	train	542	577
field0102.jpg	2571	2249	KINETOPLAST_CELL_BODY	train	571	500
field0102.jpg	2713	2154	KINETOPLAST	train	603	479
field0102.jpg	2788	2122	NUCLEUS	train	620	472
field0102.jpg	2501	2110	NUCLEUS	train	556	469
field0102.jpg	2547	2197	NUCLEUS	train	566	488
field0102.jpg	2218	2333	NUCLEUS	train	493	518
field0102.jpg	2417	2531	NUCLEUS	train	537	562
field0102.jpg	2611	1855	NUCLEUS	train	580	412
field0102.jpg	1997	3853	NUCLEUS	train	444	856
field0103.jpg	1145	2265	NUCLEUS	train	254	503
field0103.jpg	898	2354	NUCLEUS	train	200	523
field0103.jpg	1042	2540	NUCLEUS	train	232	564
field0103.jpg	826	2475	NUCLEUS	train	184	550
field0104.jpg	566	1795	KINETOPLAST_CELL_BODY	train	178	563
field0104.jpg	537	1800	NUCLEUS	train	168	565
field0104.jpg	645	1931	T_CRUZI	train	202	606
field0104.jpg	1415	2130	NUCLEUS	train	444	668
field0105.jpg	550	2023	KINETOPLAST	train	173	635
field0105.jpg	511	2007	NUCLEUS_CELL_BODY	train	160	630
field0105.jpg	550	2021	KINETOPLAST	train	173	634
field0105.jpg	699	2196	KINETOPLAST	train	219	689
field0105.jpg	737	2187	NUCLEUS_CELL_BODY	train	231	686
field0105.jpg	743	2586	NUCLEUS_CELL_BODY	train	233	811
field0105.jpg	785	2614	KINETOPLAST_CELL_BODY	train	246	820
field0105.jpg	1347	2092	KINETOPLAST	train	423	656
field0105.jpg	1307	2075	NUCLEUS	train	410	651
field0105.jpg	1411	1893	NUCLEUS	train	443	594
field0105.jpg	1450	1844	KINETOPLAST	train	455	579
field0105.jpg	2041	1274	KINETOPLAST	train	640	400
field0105.jpg	1999	1298	NUCLEUS	train	627	407
field0106.jpg	689	1484	KINETOPLAST_CELL_BODY	train	216	466
field0106.jpg	689	1527	NUCLEUS_CELL_BODY	train	216	479
field0106.jpg	947	1489	KINETOPLAST_CELL_BODY	train	297	467
field0106.jpg	900	1474	NUCLEUS	train	282	462
field0106.jpg	1777	1555	NUCLEUS	train	557	488
field0106.jpg	1746	1517	KINETOPLAST	train	548	476
field0106.jpg	1605	2101	KINETOPLAST	train	504	659
field0106.jpg	1641	2055	NUCLEUS	train	515	645
field0106.jpg	328	2131	KINETOPLAST	train	103	669
field0106.jpg	325	2159	NUCLEUS_CELL_BODY	train	102	677
field0107.jpg	1704	1134	KINETOPLAST	train	535	356
field0107.jpg	1706	1183	NUCLEUS	train	535	371
field0107.jpg	732	1523	KINETOPLAST	train	230	478
field0107.jpg	686	1548	NUCLEUS	train	215	486
field0107.jpg	1573	1746	NUCLEUS	train	493	548
field0107.jpg	1606	1748	KINETOPLAST	train	504	548
field0108.jpg	1116	919	KINETOPLAST	train	350	288
field0108.jpg	1155	970	NUCLEUS	train	362	304
field0108.jpg	942	1405	KINETOPLAST	train	296	441
field0108.jpg	876	1398	KINETOPLAST	train	275	439
field0108.jpg	887	1370	NUCLEUS_CELL_BODY	train	278	430
field0108.jpg	1892	1391	KINETOPLAST	train	594	436
field0108.jpg	1855	1468	KINETOPLAST	train	582	461
field0108.jpg	1898	1483	KINETOPLAST	train	595	465
field0108.jpg	1927	1431	NUCLEUS	train	605	449
field0108.jpg	1845	1416	NUCLEUS	train	579	444
field0108.jpg	1897	1524	NUCLEUS	train	595	478
field0108.jpg	540	2620	NUCLEUS	train	169	822
field0109.jpg	1439	1512	NUCLEUS	train	320	336
field0109.jpg	1516	1503	KINETOPLAST	train	337	334
field0109.jpg	2890	1988	KINETOPLAST	train	642	442
field0109.jpg	1454	2528	KINETOPLAST	train	323	562
field0109.jpg	1758	2614	KINETOPLAST	train	391	581
field0109.jpg	1758	2685	KINETOPLAST	train	391	597
field0109.jpg	1389	2542	NUCLEUS	train	309	565
field0109.jpg	1743	2567	NUCLEUS	train	387	570
field0109.jpg	1793	2641	NUCLEUS	train	398	587
field0109.jpg	2372	3149	KINETOPLAST	train	527	700
field0109.jpg	2890	1983	KINETOPLAST	train	642	441
field0110.jpg	1364	1020	KINETOPLAST	train	428	320
field0110.jpg	1353	969	NUCLEUS	train	424	304
field0110.jpg	1018	1394	NUCLEUS	train	319	437
field0110.jpg	988	1374	KINETOPLAST	train	310	431
field0110.jpg	731	1512	T_CRUZI	train	229	474
field0110.jpg	637	1592	KINETOPLAST	train	200	499
field0110.jpg	670	1610	NUCLEUS	train	210	505
field0110.jpg	1020	1389	NUCLEUS_CELL_BODY	train	320	436
field0110.jpg	986	1375	KINETOPLAST	train	309	431
field0110.jpg	1360	1017	KINETOPLAST	train	427	319
field0110.jpg	1354	970	NUCLEUS	train	425	304
field0110.jpg	1079	2391	NUCLEUS	train	339	750
field0110.jpg	1066	2352	KINETOPLAST	train	334	738
field0111.jpg	824	1443	KINETOPLAST	train	259	453
field0111.jpg	809	1502	NUCLEUS	train	254	471
field0111.jpg	1098	2046	NUCLEUS_CELL_BODY	train	344	642
field0111.jpg	1132	2022	KINETOPLAST	train	355	634
field0112.jpg	1997	2580	KINETOPLAST	train	444	573
field0112.jpg	2387	2382	KINETOPLAST	train	530	529
field0112.jpg	2282	2484	KINETOPLAST_CELL_BODY	train	507	552
field0112.jpg	2350	2421	NUCLEUS	train	522	538
field0112.jpg	2321	2530	NUCLEUS	train	516	562
field0112.jpg	1960	2577	NUCLEUS	train	436	573
field0112.jpg	1563	2973	NUCLEUS	train	347	661
field0112.jpg	1576	2898	KINETOPLAST_CELL_BODY	train	350	644
field0112.jpg	1978	3429	KINETOPLAST	train	440	762
field0112.jpg	1113	1524	NUCLEUS	train	247	339
field0112.jpg	1983	3374	NUCLEUS	train	441	750
field0113.jpg	761	1594	NUCLEUS	train	169	354
field0113.jpg	1057	1818	NUCLEUS	train	235	404
field0113.jpg	1078	1873	KINETOPLAST	train	240	416
field0113.jpg	1560	2697	KINETOPLAST	train	347	599
field0113.jpg	1606	2636	NUCLEUS	train	357	586
field0113.jpg	1110	3005	NUCLEUS	train	247	668
field0113.jpg	1055	2965	KINETOPLAST	train	234	659
field0113.jpg	2841	2326	KINETOPLAST	train	631	517
field0113.jpg	2800	2341	NUCLEUS	train	622	520
field0114.jpg	974	2394	NUCLEUS	train	216	532
field0114.jpg	1551	2282	KINETOPLAST	train	345	507
field0114.jpg	1600	2261	NUCLEUS	train	356	502
field0114.jpg	1021	2362	KINETOPLAST	train	227	525
field0115.jpg	1421	898	NUCLEUS	train	446	282
field0115.jpg	1408	849	KINETOPLAST	train	442	266
field0115.jpg	1533	746	NUCLEUS	train	481	234
field0115.jpg	1552	1335	KINETOPLAST_CELL_BODY	train	487	419
field0115.jpg	1554	1383	NUCLEUS_CELL_BODY	train	488	434
field0115.jpg	1636	2440	KINETOPLAST	train	513	765
field0115.jpg	1666	2395	NUCLEUS	train	523	751
field0116.jpg	898	1253	KINETOPLAST	train	200	278
field0116.jpg	830	1242	NUCLEUS	train	184	276
field0116.jpg	1027	2119	KINETOPLAST	train	228	471
field0116.jpg	1080	2112	NUCLEUS	train	240	469
field0116.jpg	447	2222	NUCLEUS	train	99	494
field0116.jpg	395	2197	KINETOPLAST	train	88	488
field0116.jpg	651	3022	KINETOPLAST	train	145	672
field0116.jpg	619	2987	NUCLEUS	train	138	664
field0116.jpg	1494	3157	KINETOPLAST	train	332	702
field0116.jpg	1544	3191	NUCLEUS	train	343	709
field0116.jpg	1855	3526	NUCLEUS	train	412	784
field0116.jpg	1911	3487	KINETOPLAST	train	425	775
field0116.jpg	1912	2654	KINETOPLAST	train	425	590
field0116.jpg	1878	2683	NUCLEUS	train	417	596
field0116.jpg	2515	2808	NUCLEUS	train	559	624
field0116.jpg	2456	2820	KINETOPLAST	train	546	627
field0117.jpg	771	2243	KINETOPLAST	train	171	498
field0117.jpg	742	2334	KINETOPLAST	train	165	519
field0117.jpg	821	2212	NUCLEUS	train	182	492
field0117.jpg	784	2387	NUCLEUS	train	174	530
field0117.jpg	2741	3361	KINETOPLAST	train	609	747
field0117.jpg	1375	3206	KINETOPLAST	train	306	712
field0118.jpg	885	1902	KINETOPLAST	train	197	423
field0118.jpg	686	1954	KINETOPLAST	train	152	434
field0118.jpg	693	1882	NUCLEUS	train	154	418
field0118.jpg	799	1934	NUCLEUS	train	178	430
field0118.jpg	2591	2569	NUCLEUS	train	576	571
field0118.jpg	2601	2640	KINETOPLAST	train	578	587
field0118.jpg	1287	2836	KINETOPLAST	train	286	630
field0118.jpg	1211	2846	NUCLEUS	train	269	632
field0118.jpg	1267	3719	NUCLEUS	train	282	826
field0118.jpg	1206	3738	KINETOPLAST	train	268	831
field0119.jpg	1490	1971	KINETOPLAST	train	331	438
field0119.jpg	1584	1931	NUCLEUS_CELL_BODY	train	352	429
field0119.jpg	2205	2368	NUCLEUS	train	490	526
field0119.jpg	2191	2435	KINETOPLAST	train	487	541
field0119.jpg	2248	1884	KINETOPLAST	train	500	419
field0119.jpg	2845	2441	KINETOPLAST	train	632	542
field0119.jpg	2300	1208	NUCLEUS	train	511	268
field0119.jpg	2895	2457	NUCLEUS	train	643	546
field0119.jpg	2295	1860	NUCLEUS	train	510	413
field0120.jpg	1214	1499	KINETOPLAST	train	381	470
field0120.jpg	1165	1506	NUCLEUS	train	365	472
field0120.jpg	2029	1537	T_CRUZI	train	637	482
field0120.jpg	1017	1907	T_CRUZI	train	319	598
field0120.jpg	433	1865	KINETOPLAST	train	136	585
field0120.jpg	504	2136	KINETOPLAST	train	158	670
field0120.jpg	490	1894	NUCLEUS	train	154	594
field0120.jpg	492	2091	NUCLEUS_CELL_BODY	train	154	656
field0120.jpg	1126	2049	KINETOPLAST	train	353	643
field0120.jpg	1182	2061	NUCLEUS	train	371	647
field0121.jpg	1243	1540	NUCLEUS	train	390	483
field0121.jpg	973	1479	NUCLEUS	train	305	464
field0121.jpg	1283	1523	KINETOPLAST	train	403	478
field0121.jpg	1020	1506	KINETOPLAST	train	320	472
field0121.jpg	345	1637	KINETOPLAST	train	108	514
field0121.jpg	198	1635	KINETOPLAST	train	62	513
field0121.jpg	186	1680	NUCLEUS_CELL_BODY	train	58	527
field0121.jpg	359	1654	NUCLEUS	train	113	519
field0121.jpg	1078	2036	NUCLEUS	train	338	639
field0121.jpg	1108	2000	KINETOPLAST_CELL_BODY	train	348	627
field0121.jpg	1659	2687	KINETOPLAST	train	520	843
field0121.jpg	1676	2637	NUCLEUS	train	526	827
field0122.jpg	484	1744	KINETOPLAST	train	108	388
field0122.jpg	427	1745	KINETOPLAST	train	95	388
field0122.jpg	343	1722	NUCLEUS_CELL_BODY	train	76	383
field0122.jpg	1829	2778	KINETOPLAST	train	406	617
field0122.jpg	1957	3188	KINETOPLAST	train	435	708
field0122.jpg	1877	2725	NUCLEUS_CELL_BODY	train	417	606
field0122.jpg	1945	3230	NUCLEUS_CELL_BODY	train	432	718
field0123.jpg	1059	1198	KINETOPLAST	train	235	266
field0123.jpg	1110	1256	NUCLEUS	train	247	279
field0123.jpg	1607	2282	NUCLEUS	train	357	507
field0123.jpg	1670	2255	KINETOPLAST	train	371	501
field0123.jpg	2582	2774	KINETOPLAST	train	574	616
field0123.jpg	2526	2757	NUCLEUS	train	561	613
field0123.jpg	1173	2945	KINETOPLAST	train	261	654
field0123.jpg	1181	3004	NUCLEUS	train	262	668
field0124.jpg	1064	2209	KINETOPLAST	train	236	491
field0124.jpg	1136	2233	NUCLEUS	train	252	496
field0124.jpg	2081	2289	NUCLEUS	train	462	509
field0124.jpg	2037	2278	KINETOPLAST	train	453	506
field0124.jpg	2091	2284	NUCLEUS	train	465	508
field0124.jpg	2038	2278	KINETOPLAST	train	453	506
field0125.jpg	2404	2385	KINETOPLAST	train	534	530
field0125.jpg	2365	2337	NUCLEUS	train	526	519
field0125.jpg	1794	2828	NUCLEUS	train	399	628
field0125.jpg	1720	3023	NUCLEUS	train	382	672
field0125.jpg	1751	2777	KINETOPLAST	train	389	617
field0125.jpg	1754	2988	KINETOPLAST	train	390	664
field0125.jpg	1275	1489	NUCLEUS	train	283	331
field0125.jpg	1663	994	NUCLEUS	train	370	221
field0125.jpg	564	3068	NUCLEUS	train	125	682
field0127.jpg	1224	1912	NUCLEUS	train	384	600
field0127.jpg	1428	2167	NUCLEUS	train	448	680
field0127.jpg	1252	1877	KINETOPLAST_CELL_BODY	train	393	589
field0127.jpg	1405	2205	KINETOPLAST_CELL_BODY	train	441	692
field0128.jpg	1580	2300	KINETOPLAST	train	351	511
field0128.jpg	1553	2258	NUCLEUS	train	345	502
field0128.jpg	2477	2220	NUCLEUS	train	550	493
field0128.jpg	2430	2191	KINETOPLAST	train	540	487
field0128.jpg	589	1981	NUCLEUS	train	131	440
field0129.jpg	1872	1624	KINETOPLAST	train	416	361
field0129.jpg	1979	1763	KINETOPLAST	train	440	392
field0129.jpg	1954	1721	NUCLEUS	train	434	382
field0129.jpg	1262	2327	NUCLEUS	train	280	517
field0129.jpg	1304	2259	KINETOPLAST	train	290	502
field0129.jpg	1732	3402	KINETOPLAST	train	385	756
field0129.jpg	1327	3615	KINETOPLAST	train	295	803
field0129.jpg	1812	3398	NUCLEUS	train	403	755
field0129.jpg	1371	3558	NUCLEUS	train	305	791
field0129.jpg	2193	2713	NUCLEUS	train	487	603
field0130.jpg	828	1239	T_CRUZI	train	260	389
field0130.jpg	545	1266	KINETOPLAST_CELL_BODY	train	171	397
field0130.jpg	533	1307	NUCLEUS_CELL_BODY	train	167	410
field0130.jpg	1222	1451	KINETOPLAST	train	383	455
field0130.jpg	1263	1421	NUCLEUS	train	396	446
field0130.jpg	1369	1988	KINETOPLAST	train	429	624
field0130.jpg	1378	2055	NUCLEUS	train	432	645
field0130.jpg	853	2172	KINETOPLAST	train	268	681
field0130.jpg	854	2141	NUCLEUS	train	268	672
field0130.jpg	608	2280	NUCLEUS_CELL_BODY	train	191	715
field0130.jpg	564	2311	KINETOPLAST	train	177	725
field0130.jpg	554	2633	KINETOPLAST_CELL_BODY	train	174	826
field0130.jpg	516	2634	NUCLEUS	train	162	826
field0130.jpg	925	2799	NUCLEUS	train	290	878
field0130.jpg	934	2734	KINETOPLAST	train	293	858
field0130.jpg	1370	1988	KINETOPLAST	train	430	624
field0130.jpg	1376	2052	NUCLEUS_CELL_BODY	train	432	644
field0130.jpg	103	1746	NUCLEUS	train	32	548
field0131.jpg	1001	1071	NUCLEUS	train	314	336
field0131.jpg	1011	1135	KINETOPLAST	train	317	356
field0131.jpg	794	1253	KINETOPLAST	train	249	393
field0131.jpg	841	1251	NUCLEUS	train	264	392
field0131.jpg	1856	1546	T_CRUZI	train	582	485
field0131.jpg	1864	1756	KINETOPLAST	train	585	551
field0131.jpg	1896	1744	NUCLEUS	train	595	547
field0131.jpg	1062	1962	T_CRUZI	train	333	616
field0131.jpg	456	1917	T_CRUZI	train	143	601
field0131.jpg	1422	1678	T_CRUZI	train	446	526
field0131.jpg	114	1756	NUCLEUS	train	36	551
field0132.jpg	567	1544	KINETOPLAST_CELL_BODY	train	178	484
field0132.jpg	549	1517	NUCLEUS_CELL_BODY	train	172	476
field0132.jpg	947	1391	T_CRUZI	train	297	436
field0132.jpg	2128	1410	KINETOPLAST	train	668	442
field0132.jpg	2128	1448	NUCLEUS	train	668	454
field0132.jpg	1382	2220	NUCLEUS_CELL_BODY	train	434	696
field0132.jpg	1419	2182	KINETOPLAST	train	445	685
field0132.jpg	580	2114	KINETOPLAST	train	182	663
field0132.jpg	575	2138	NUCLEUS_CELL_BODY	train	180	671
field0132.jpg	2130	2171	T_CRUZI	train	668	681
field0133.jpg	1526	2217	NUCLEUS	train	339	493
field0133.jpg	1457	2193	KINETOPLAST	train	324	487
field0134.jpg	1637	2052	KINETOPLAST	train	364	456
field0134.jpg	1675	2021	NUCLEUS	train	372	449
field0134.jpg	1277	2049	KINETOPLAST	train	284	455
field0134.jpg	1159	2297	KINETOPLAST	train	258	510
field0134.jpg	1220	2254	NUCLEUS	train	271	501
field0134.jpg	1075	2463	NUCLEUS	train	239	547
field0134.jpg	1047	2527	KINETOPLAST	train	233	562
field0134.jpg	1739	3885	KINETOPLAST	train	386	863
field0134.jpg	1739	3941	NUCLEUS	train	386	876
field0135.jpg	937	1147	KINETOPLAST	train	294	360
field0135.jpg	1699	1274	KINETOPLAST	train	533	400
field0135.jpg	1711	1325	NUCLEUS	train	537	416
field0135.jpg	1052	1961	NUCLEUS	train	330	615
field0135.jpg	1023	1940	KINETOPLAST	train	321	609
field0135.jpg	882	2212	KINETOPLAST	train	277	694
field0135.jpg	848	2179	NUCLEUS	train	266	684
field0136.jpg	1245	2049	NUCLEUS_CELL_BODY	train	277	455
field0136.jpg	1227	1961	KINETOPLAST	train	273	436
field0136.jpg	824	2646	KINETOPLAST	train	183	588
field0136.jpg	856	2585	NUCLEUS	train	190	574
field0136.jpg	2379	2437	NUCLEUS	train	529	542
field0136.jpg	2400	2383	KINETOPLAST	train	533	530
field0137.jpg	1792	1743	KINETOPLAST	train	398	387
field0137.jpg	1962	1857	KINETOPLAST	train	436	413
field0137.jpg	1841	1802	NUCLEUS	train	409	400
field0137.jpg	2023	1885	NUCLEUS	train	450	419
field0137.jpg	1568	2132	KINETOPLAST	train	348	474
field0137.jpg	1480	2442	KINETOPLAST	train	329	543
field0137.jpg	1838	2418	KINETOPLAST	train	408	537
field0137.jpg	2386	2900	KINETOPLAST	train	530	644
field0137.jpg	1790	2400	NUCLEUS	train	398	533
field0137.jpg	1530	2482	NUCLEUS_CELL_BODY	train	340	552
field0137.jpg	949	3154	KINETOPLAST	train	211	701
field0137.jpg	913	3215	NUCLEUS	train	203	714
field0137.jpg	2356	2856	NUCLEUS	train	524	635
field0137.jpg	1490	2126	NUCLEUS	train	331	472
field0138.jpg	1006	2390	KINETOPLAST	train	224	531
field0138.jpg	1049	2373	NUCLEUS	train	233	527
field0138.jpg	2210	2194	NUCLEUS	train	491	488
field0138.jpg	2154	2166	KINETOPLAST	train	479	481
field0138.jpg	2811	2328	KINETOPLAST	train	625	517
field0138.jpg	2794	2405	NUCLEUS	train	621	534
field0138.jpg	2908	2994	T_CRUZI	train	646	665
field0139.jpg	1285	2104	KINETOPLAST	train	286	468
field0139.jpg	1226	2151	NUCLEUS	train	272	478
field0139.jpg	1613	2857	NUCLEUS	train	358	635
field0139.jpg	1536	2913	KINETOPLAST	train	341	647
field0139.jpg	1832	2987	KINETOPLAST	train	407	664
field0139.jpg	1792	2908	NUCLEUS	train	398	646
field0139.jpg	2416	3469	NUCLEUS	train	537	771
field0140.jpg	1338	2901	KINETOPLAST	train	297	645
field0140.jpg	1309	2864	NUCLEUS	train	291	636
field0140.jpg	2637	2647	NUCLEUS	train	586	588
field0140.jpg	2638	2557	KINETOPLAST	train	586	568
field0140.jpg	532	2944	NUCLEUS	train	118	654
field0141.jpg	955	1587	KINETOPLAST	train	212	353
field0141.jpg	694	1949	KINETOPLAST	train	154	433
field0141.jpg	652	2022	NUCLEUS	train	145	449
field0141.jpg	1065	2210	NUCLEUS	train	237	491
field0141.jpg	1038	2243	KINETOPLAST	train	231	498
field0141.jpg	1619	2266	KINETOPLAST	train	360	504
field0141.jpg	1562	2215	NUCLEUS	train	347	492
field0141.jpg	1897	2163	NUCLEUS_CELL_BODY	train	422	481
field0141.jpg	1833	2099	KINETOPLAST	train	407	466
field0141.jpg	2527	1853	KINETOPLAST	train	562	412
field0141.jpg	2457	1824	NUCLEUS	train	546	405
field0141.jpg	2997	1881	KINETOPLAST	train	666	418
field0141.jpg	2031	2965	KINETOPLAST	train	451	659
field0141.jpg	1984	2947	NUCLEUS	train	441	655
field0141.jpg	962	1649	NUCLEUS	train	214	366
field0141.jpg	3020	1804	NUCLEUS	train	671	401
field0141.jpg	1418	1336	T_CRUZI	train	315	297
field0142.jpg	1034	1222	KINETOPLAST	train	230	272
field0142.jpg	3057	2223	KINETOPLAST	train	679	494
field0142.jpg	3032	2280	NUCLEUS_CELL_BODY	train	674	507
field0142.jpg	1331	2981	KINETOPLAST	train	296	662
field0142.jpg	1297	3054	NUCLEUS	train	288	679
field0142.jpg	1358	3592	NUCLEUS	train	302	798
field0142.jpg	1260	3600	KINETOPLAST	train	280	800
field0142.jpg	1106	1242	NUCLEUS	train	246	276
field0143.jpg	628	1144	KINETOPLAST	train	197	359
field0143.jpg	653	1157	NUCLEUS	train	205	363
field0143.jpg	1337	1527	NUCLEUS	train	419	479
field0143.jpg	1323	1559	KINETOPLAST	train	415	489
field0143.jpg	1633	1621	KINETOPLAST	train	512	509
field0143.jpg	1669	1601	NUCLEUS_CELL_BODY	train	524	502
field0143.jpg	1720	1754	NUCLEUS	train	540	550
field0143.jpg	1673	1738	KINETOPLAST	train	525	545
field0143.jpg	676	2146	KINETOPLAST	train	212	673
field0143.jpg	685	2190	NUCLEUS_CELL_BODY	train	215	687
field0143.jpg	967	2306	KINETOPLAST	train	303	723
field0143.jpg	992	2287	NUCLEUS	train	311	717
field0143.jpg	1755	1200	NUCLEUS	train	551	376
field0143.jpg	1724	1189	KINETOPLAST	train	541	373
field0144.jpg	759	1875	NUCLEUS	train	169	417
field0144.jpg	806	1819	KINETOPLAST	train	179	404
field0144.jpg	2344	2268	KINETOPLAST	train	521	504
field0144.jpg	2305	2212	NUCLEUS_CELL_BODY	train	512	492
field0144.jpg	2872	2321	KINETOPLAST	train	638	516
field0144.jpg	2899	2266	NUCLEUS	train	644	504
field0145.jpg	874	1945	KINETOPLAST	train	274	610
field0145.jpg	865	1904	NUCLEUS	train	271	597
field0145.jpg	1749	2266	NUCLEUS	train	549	711
field0145.jpg	1801	2235	KINETOPLAST	train	565	701
field0146.jpg	1580	923	NUCLEUS	train	496	290
field0146.jpg	1462	962	NUCLEUS	train	459	302
field0146.jpg	1334	989	NUCLEUS	train	419	310
field0146.jpg	1588	886	KINETOPLAST	train	498	278
field0146.jpg	1507	981	KINETOPLAST	train	473	308
field0146.jpg	1360	938	KINETOPLAST	train	427	294
field0146.jpg	1605	1755	KINETOPLAST	train	504	551
field0146.jpg	1789	1660	KINETOPLAST	train	561	521
field0146.jpg	1751	1717	KINETOPLAST_CELL_BODY	train	549	539
field0146.jpg	1809	1608	NUCLEUS	train	568	504
field0146.jpg	1763	1759	NUCLEUS	train	553	552
field0146.jpg	1640	1777	NUCLEUS	train	515	557
field0146.jpg	1463	1887	KINETOPLAST	train	459	592
field0146.jpg	1409	1859	NUCLEUS_CELL_BODY	train	442	583
field0146.jpg	539	1938	T_CRUZI	train	169	608
field0146.jpg	407	1519	KINETOPLAST	train	128	477
field0146.jpg	443	1466	NUCLEUS	train	139	460
field0146.jpg	1343	2652	NUCLEUS	train	421	832
field0146.jpg	1303	2628	KINETOPLAST	train	409	824
field0146.jpg	1713	2334	KINETOPLAST	train	537	732
field0146.jpg	1711	2301	NUCLEUS	train	537	722
field0146.jpg	2245	1559	KINETOPLAST	train	704	489
field0147.jpg	883	1228	NUCLEUS	train	277	385
field0147.jpg	920	1272	KINETOPLAST	train	289	399
field0147.jpg	911	1331	KINETOPLAST_CELL_BODY	train	286	418
field0147.jpg	883	1383	NUCLEUS	train	277	434
field0147.jpg	1581	1504	T_CRUZI	train	496	472
field0147.jpg	1592	1680	KINETOPLAST	train	499	527
field0147.jpg	1547	1643	NUCLEUS	train	485	515
field0147.jpg	1828	1689	T_CRUZI	train	573	530
field0147.jpg	1992	1686	KINETOPLAST	train	625	529
field0147.jpg	1946	1648	NUCLEUS	train	611	517
field0147.jpg	840	2221	NUCLEUS	train	264	697
field0147.jpg	857	2257	KINETOPLAST_CELL_BODY	train	269	708
field0148.jpg	782	2503	KINETOPLAST	train	174	556
field0148.jpg	868	2530	NUCLEUS	train	193	562
field0149.jpg	917	2208	NUCLEUS	train	204	491
field0149.jpg	1007	2236	KINETOPLAST	train	224	497
field0150.jpg	2225	2594	KINETOPLAST	train	494	576
field0150.jpg	1746	2884	KINETOPLAST	train	388	641
field0150.jpg	2142	3055	KINETOPLAST	train	476	679
field0150.jpg	1798	2880	NUCLEUS	train	400	640
field0150.jpg	2185	3091	NUCLEUS	train	486	687
field0150.jpg	2272	2617	NUCLEUS	train	505	582
field0151.jpg	750	1580	NUCLEUS	train	235	496
field0151.jpg	656	1663	NUCLEUS	train	206	522
field0151.jpg	723	1538	KINETOPLAST	train	227	483
field0151.jpg	689	1630	KINETOPLAST	train	216	511
field0151.jpg	1183	1961	KINETOPLAST	train	371	615
field0151.jpg	1153	1935	NUCLEUS_CELL_BODY	train	362	607
field0152.jpg	955	1630	KINETOPLAST	train	212	362
field0152.jpg	980	1571	NUCLEUS	train	218	349
field0152.jpg	606	2639	NUCLEUS	train	135	586
field0152.jpg	623	2699	KINETOPLAST	train	138	600
field0152.jpg	3034	2173	KINETOPLAST	train	674	483
field0152.jpg	3073	2225	NUCLEUS	train	683	494
field0153.jpg	1021	2180	NUCLEUS	train	227	484
field0153.jpg	1065	2209	KINETOPLAST	train	237	491
field0153.jpg	804	2509	KINETOPLAST	train	179	558
field0153.jpg	736	2447	NUCLEUS	train	164	544
field0153.jpg	2116	3103	NUCLEUS	train	470	690
field0153.jpg	2197	3138	KINETOPLAST	train	488	697
field0154.jpg	1229	3088	KINETOPLAST	train	273	686
field0154.jpg	1219	3003	NUCLEUS	train	271	667
field0154.jpg	554	2984	NUCLEUS	train	123	663
field0154.jpg	558	2919	KINETOPLAST	train	124	649
field0154.jpg	2342	2179	KINETOPLAST	train	520	484
field0154.jpg	2400	2118	NUCLEUS	train	533	471
field0154.jpg	1440	1733	NUCLEUS	train	320	385
field0154.jpg	2937	1952	NUCLEUS	train	653	434
field0155.jpg	1476	1592	NUCLEUS	train	328	354
field0155.jpg	1492	1649	KINETOPLAST	train	332	366
field0157.jpg	1227	2372	KINETOPLAST	train	385	744
field0157.jpg	1222	2422	NUCLEUS	train	383	760
field0158.jpg	1487	1436	NUCLEUS_CELL_BODY	train	467	451
field0158.jpg	1498	1494	KINETOPLAST	train	470	469
field0158.jpg	1661	2068	KINETOPLAST	train	521	649
field0158.jpg	1607	2094	NUCLEUS	train	504	657
field0158.jpg	936	2168	NUCLEUS	train	294	680
field0158.jpg	888	2138	KINETOPLAST	train	279	671
field0158.jpg	290	1564	KINETOPLAST_CELL_BODY	train	91	491
field0158.jpg	300	1614	NUCLEUS_CELL_BODY	train	94	506
field0158.jpg	889	2136	KINETOPLAST	train	279	670
field0158.jpg	937	2168	NUCLEUS	train	294	680
field0159.jpg	2024	2351	KINETOPLAST	train	450	522
field0159.jpg	2280	2629	KINETOPLAST	train	507	584
field0159.jpg	1142	3675	KINETOPLAST	train	254	817
field0159.jpg	2004	2393	NUCLEUS	train	445	532
field0159.jpg	2244	2669	NUCLEUS	train	499	593
field0159.jpg	1134	3715	NUCLEUS	train	252	826
field0159.jpg	507	3608	NUCLEUS	train	113	802
field0159.jpg	500	3652	KINETOPLAST	train	111	812
field0160.jpg	1119	1447	KINETOPLAST	train	351	454
field0160.jpg	1149	1476	NUCLEUS	train	360	463
field0160.jpg	1470	941	NUCLEUS	train	461	295
field0160.jpg	1433	928	KINETOPLAST	train	450	291
field0160.jpg	446	2379	KINETOPLAST	train	140	746
field0160.jpg	492	2385	NUCLEUS	train	154	748
field0160.jpg	611	2587	NUCLEUS_CELL_BODY	train	192	812
field0160.jpg	585	2595	KINETOPLAST	train	184	814
field0160.jpg	1123	1447	KINETOPLAST	train	352	454
field0160.jpg	1149	1476	NUCLEUS	train	360	463
field0160.jpg	1592	1452	NUCLEUS	train	499	456
field0160.jpg	1554	1445	KINETOPLAST	train	488	453
field0161.jpg	1888	2553	KINETOPLAST	train	420	567
field0161.jpg	1942	2524	NUCLEUS	train	432	561
field0161.jpg	1777	2137	NUCLEUS	train	395	475
field0161.jpg	1799	2206	KINETOPLAST	train	400	490
field0161.jpg	694	1486	NUCLEUS	train	154	330
field0161.jpg	653	1467	KINETOPLAST	train	145	326
field0162.jpg	1661	1783	KINETOPLAST	train	369	396
field0162.jpg	1727	1800	NUCLEUS	train	384	400
field0162.jpg	1703	2092	NUCLEUS	train	378	465
field0162.jpg	1670	2154	KINETOPLAST	train	371	479
field0162.jpg	1437	3489	KINETOPLAST	train	319	775
field0162.jpg	1497	3520	NUCLEUS	train	333	782
field0162.jpg	3041	3212	NUCLEUS	train	676	714
field0162.jpg	3011	3277	KINETOPLAST	train	669	728
field0162.jpg	2177	2022	NUCLEUS	train	484	449
field0162.jpg	2127	1962	KINETOPLAST	train	473	436
field0163.jpg	1167	1471	KINETOPLAST_CELL_BODY	train	366	461
field0163.jpg	1135	1428	NUCLEUS_CELL_BODY	train	356	448
field0163.jpg	1469	1660	KINETOPLAST	train	461	521
field0163.jpg	1461	1631	NUCLEUS	train	458	512
field0163.jpg	1327	2176	KINETOPLAST_CELL_BODY	train	416	683
field0163.jpg	1366	2220	NUCLEUS_CELL_BODY	train	429	696
field0163.jpg	409	1907	KINETOPLAST	train	128	598
field0163.jpg	449	1905	NUCLEUS	train	141	598
field0164.jpg	381	1014	NUCLEUS	train	120	318
field0164.jpg	349	1061	KINETOPLAST	train	109	333
field0164.jpg	1189	739	KINETOPLAST	train	373	232
field0164.jpg	1182	806	NUCLEUS_CELL_BODY	train	371	253
field0164.jpg	1474	1105	NUCLEUS_CELL_BODY	train	462	347
field0164.jpg	1443	1079	KINETOPLAST	train	453	339
field0164.jpg	427	1789	KINETOPLAST_CELL_BODY	train	134	561
field0164.jpg	426	1752	NUCLEUS	train	134	550
field0164.jpg	641	1934	NUCLEUS	train	201	607
field0164.jpg	693	1952	KINETOPLAST	train	217	612
field0164.jpg	906	1856	T_CRUZI	train	284	582
field0164.jpg	1437	1847	KINETOPLAST	train	451	579
field0164.jpg	1423	1798	NUCLEUS	train	446	564
field0164.jpg	1334	2134	KINETOPLAST_CELL_BODY	train	419	669
field0164.jpg	1302	2124	NUCLEUS	train	408	666
field0164.jpg	1789	1915	NUCLEUS	train	561	601
field0164.jpg	1749	1888	KINETOPLAST	train	549	592
field0165.jpg	1172	1337	T_CRUZI	train	368	419
field0165.jpg	1240	1362	KINETOPLAST	train	389	427
field0165.jpg	1425	1372	KINETOPLAST	train	447	430
field0165.jpg	1243	1322	NUCLEUS	train	390	415
field0165.jpg	1446	1394	NUCLEUS	train	454	437
field0165.jpg	1910	1709	NUCLEUS	train	599	536
field0165.jpg	1918	1754	KINETOPLAST	train	602	550
field0165.jpg	1212	1887	KINETOPLAST	train	380	592
field0165.jpg	1235	1871	NUCLEUS	train	387	587
field0165.jpg	1012	2461	NUCLEUS_CELL_BODY	train	317	772
field0165.jpg	966	2447	KINETOPLAST	train	303	768
field0165.jpg	462	2577	KINETOPLAST	train	145	808
field0165.jpg	442	2532	NUCLEUS	train	139	794
field0166.jpg	1731	1255	NUCLEUS_CELL_BODY	train	543	394
field0166.jpg	1727	1210	KINETOPLAST	train	542	380
field0166.jpg	1065	1840	KINETOPLAST	train	334	577
field0166.jpg	1070	1879	NUCLEUS_CELL_BODY	train	336	589
field0166.jpg	1168	2076	KINETOPLAST	train	366	651
field0166.jpg	1142	2047	NUCLEUS	train	358	642
field0167.jpg	1422	1579	NUCLEUS	train	316	351
field0167.jpg	1370	1641	KINETOPLAST	train	304	365
field0167.jpg	2199	1913	KINETOPLAST	train	489	425
field0167.jpg	2285	1910	NUCLEUS	train	508	424
field0167.jpg	1770	2235	NUCLEUS	train	393	497
field0167.jpg	1799	2252	KINETOPLAST	train	400	500
field0167.jpg	1982	2842	KINETOPLAST	train	440	632
field0167.jpg	1992	2773	NUCLEUS	train	443	616
field0167.jpg	2650	3062	KINETOPLAST	train	589	680
field0167.jpg	2881	3141	KINETOPLAST	train	640	698
field0167.jpg	2642	3002	NUCLEUS	train	587	667
field0167.jpg	2872	3253	NUCLEUS	train	638	723
field0168.jpg	978	1093	KINETOPLAST	train	307	343
field0168.jpg	1012	1043	NUCLEUS_CELL_BODY	train	317	327
field0168.jpg	1241	1299	KINETOPLAST	train	389	408
field0168.jpg	1249	1341	NUCLEUS_CELL_BODY	train	392	421
field0168.jpg	1270	1572	KINETOPLAST_CELL_BODY	train	398	493
field0168.jpg	1243	1576	NUCLEUS	train	390	494
field0168.jpg	1287	2292	NUCLEUS	train	404	719
field0168.jpg	1260	2331	KINETOPLAST_CELL_BODY	train	395	731
field0169.jpg	1479	1379	KINETOPLAST	train	464	433
field0169.jpg	1505	1411	NUCLEUS	train	472	443
field0169.jpg	419	1766	KINETOPLAST	train	131	554
field0169.jpg	449	1728	NUCLEUS	train	141	542
field0169.jpg	1000	1887	NUCLEUS	train	314	592
field0169.jpg	971	1891	KINETOPLAST	train	305	593
field0169.jpg	992	2234	KINETOPLAST	train	311	701
field0169.jpg	1011	2278	NUCLEUS	train	317	715
field0169.jpg	2083	1751	NUCLEUS	train	653	549
field0170.jpg	801	2210	KINETOPLAST	train	178	491
field0170.jpg	605	2264	KINETOPLAST	train	134	503
field0170.jpg	609	2188	NUCLEUS	train	135	486
field0170.jpg	724	2248	NUCLEUS	train	161	500
field0170.jpg	1204	3154	KINETOPLAST	train	268	701
field0170.jpg	1129	3155	NUCLEUS	train	251	701
field0170.jpg	2514	2882	NUCLEUS	train	559	640
field0170.jpg	2521	2946	KINETOPLAST	train	560	655
field0171.jpg	1134	2088	KINETOPLAST	train	252	464
field0171.jpg	1163	2057	NUCLEUS_CELL_BODY	train	258	457
field0171.jpg	3024	2577	NUCLEUS	train	672	573
field0171.jpg	2997	2640	KINETOPLAST	train	666	587
field0171.jpg	2735	2644	KINETOPLAST	train	608	588
field0171.jpg	1340	3328	KINETOPLAST	train	298	740
field0171.jpg	1405	3342	NUCLEUS	train	312	743
field0171.jpg	2771	2616	NUCLEUS	train	616	581
field0172.jpg	2030	1987	NUCLEUS_CELL_BODY	train	451	442
field0172.jpg	1903	2043	NUCLEUS	train	423	454
field0172.jpg	1961	1976	KINETOPLAST	train	436	439
field0172.jpg	1856	2003	KINETOPLAST	train	412	445
field0172.jpg	2079	2144	KINETOPLAST	train	462	476
field0172.jpg	2399	2316	KINETOPLAST	train	533	515
field0172.jpg	1625	2777	KINETOPLAST	train	361	617
field0172.jpg	1573	2772	NUCLEUS	train	350	616
field0172.jpg	561	3428	NUCLEUS	train	125	762
field0172.jpg	599	3364	NUCLEUS_CELL_BODY	train	133	748
field0172.jpg	531	3487	KINETOPLAST	train	118	775
field0172.jpg	640	3423	KINETOPLAST	train	142	761
field0172.jpg	2130	2218	NUCLEUS	train	473	493
field0172.jpg	2424	2430	NUCLEUS	train	539	540
field0172.jpg	1318	1342	NUCLEUS	train	293	298
field0172.jpg	1123	3664	NUCLEUS	train	250	814
field0173.jpg	361	1414	KINETOPLAST	train	113	444
field0173.jpg	308	1419	NUCLEUS_CELL_BODY	train	97	445
field0173.jpg	614	1833	T_CRUZI	train	193	575
field0173.jpg	1219	2499	KINETOPLAST	train	382	784
field0173.jpg	1216	2572	NUCLEUS_CELL_BODY	train	381	807
field0173.jpg	675	1839	NUCLEUS	train	212	577
field0173.jpg	1669	1999	NUCLEUS	train	524	627
field0174.jpg	1822	1402	KINETOPLAST	train	405	312
field0174.jpg	1312	2924	KINETOPLAST	train	292	650
field0174.jpg	1060	2911	KINETOPLAST	train	236	647
field0174.jpg	1359	2895	NUCLEUS	train	302	643
field0174.jpg	1070	2866	NUCLEUS	train	238	637
field0174.jpg	271	2685	NUCLEUS	train	60	597
field0174.jpg	328	2732	KINETOPLAST	train	73	607
field0174.jpg	1860	1460	NUCLEUS	train	413	324
field0175.jpg	2099	1546	KINETOPLAST	train	466	344
field0175.jpg	2156	1576	NUCLEUS	train	479	350
field0175.jpg	2345	2318	NUCLEUS	train	521	515
field0175.jpg	2388	2249	KINETOPLAST	train	531	500
field0176.jpg	367	1483	KINETOPLAST	train	115	465
field0176.jpg	380	1452	NUCLEUS	train	119	456
field0176.jpg	553	2573	NUCLEUS	train	173	807
field0176.jpg	509	2532	KINETOPLAST	train	160	794
field0176.jpg	1226	2520	KINETOPLAST	train	385	791
field0176.jpg	1234	2475	NUCLEUS	train	387	776
field0177.jpg	1097	2177	KINETOPLAST	train	244	484
field0177.jpg	1110	2088	NUCLEUS_CELL_BODY	train	247	464
field0177.jpg	1248	2995	NUCLEUS	train	277	666
field0177.jpg	1297	2940	KINETOPLAST	train	288	653
field0177.jpg	1096	2180	KINETOPLAST	train	244	484
field0177.jpg	1107	2092	NUCLEUS_CELL_BODY	train	246	465
field0178.jpg	1269	994	KINETOPLAST	train	282	221
field0178.jpg	1209	1023	NUCLEUS	train	269	227
field0178.jpg	1583	1797	NUCLEUS	train	352	399
field0178.jpg	1526	1761	KINETOPLAST	train	339	391
field0178.jpg	1332	2895	KINETOPLAST	train	296	643
field0178.jpg	1325	2849	NUCLEUS	train	294	633
field0178.jpg	1506	2879	NUCLEUS_CELL_BODY	train	335	640
field0178.jpg	2111	2862	KINETOPLAST	train	469	636
field0178.jpg	2122	2818	NUCLEUS	train	472	626
field0178.jpg	1803	3393	KINETOPLAST	train	401	754
field0178.jpg	1774	3490	NUCLEUS_CELL_BODY	train	394	776
field0178.jpg	1516	3587	KINETOPLAST	train	337	797
field0178.jpg	1512	3589	KINETOPLAST	train	336	798
field0178.jpg	1418	3592	NUCLEUS_CELL_BODY	train	315	798
field0178.jpg	2598	3086	NUCLEUS	train	577	686
field0178.jpg	2556	3108	KINETOPLAST	train	568	691
field0179.jpg	1762	2015	KINETOPLAST	train	392	448
field0179.jpg	1580	2312	KINETOPLAST	train	351	514
field0179.jpg	1565	2518	KINETOPLAST	train	348	560
field0179.jpg	1633	2265	NUCLEUS	train	363	503
field0179.jpg	1629	2512	NUCLEUS	train	362	558
field0179.jpg	2131	3084	NUCLEUS	train	474	685
field0179.jpg	2095	3058	KINETOPLAST	train	466	680
field0179.jpg	1677	2016	NUCLEUS	train	373	448
field0179.jpg	338	1664	NUCLEUS	train	75	370
field0179.jpg	305	1710	KINETOPLAST	train	68	380
field0181.jpg	1596	1481	NUCLEUS	train	501	465
field0181.jpg	1651	1472	KINETOPLAST	train	518	462
field0181.jpg	1283	1855	KINETOPLAST	train	403	582
field0181.jpg	1318	1844	NUCLEUS_CELL_BODY	train	413	579
field0181.jpg	800	1666	KINETOPLAST	train	251	523
field0181.jpg	815	1659	NUCLEUS_CELL_BODY	train	256	520
field0181.jpg	2018	2278	NUCLEUS	train	633	715
field0182.jpg	358	1648	T_CRUZI	train	112	517
field0182.jpg	1551	1603	T_CRUZI	train	487	503
field0182.jpg	1866	1801	KINETOPLAST	train	585	565
field0182.jpg	1827	1768	NUCLEUS_CELL_BODY	train	573	555
field0183.jpg	1695	2381	KINETOPLAST	train	377	529
field0183.jpg	1748	2318	NUCLEUS	train	388	515
field0183.jpg	1721	3165	NUCLEUS	train	382	703
field0183.jpg	1633	3384	NUCLEUS	train	363	752
field0183.jpg	1663	3226	KINETOPLAST	train	370	717
field0183.jpg	1591	3433	KINETOPLAST	train	354	763
field0183.jpg	1249	1611	NUCLEUS	train	278	358
field0183.jpg	909	3740	NUCLEUS	train	202	831
field0184.jpg	1025	837	KINETOPLAST	train	322	263
field0184.jpg	1059	867	NUCLEUS	train	332	272
field0184.jpg	1167	1443	KINETOPLAST	train	366	453
field0184.jpg	1212	1484	NUCLEUS	train	380	466
field0184.jpg	994	1608	NUCLEUS	train	312	504
field0184.jpg	1136	1607	NUCLEUS	train	356	504
field0184.jpg	1008	1634	KINETOPLAST	train	316	513
field0184.jpg	1167	1609	KINETOPLAST	train	366	505
field0184.jpg	1225	1805	NUCLEUS	train	384	566
field0184.jpg	1219	1771	KINETOPLAST	train	382	556
field0184.jpg	788	1880	KINETOPLAST	train	247	590
field0184.jpg	807	1912	NUCLEUS	train	253	600
field0184.jpg	1582	2406	KINETOPLAST	train	496	755
field0184.jpg	1622	2399	NUCLEUS	train	509	753
field0184.jpg	1955	2008	NUCLEUS	train	613	630
field0184.jpg	1872	1939	NUCLEUS	train	587	608
field0184.jpg	1851	1934	KINETOPLAST	train	581	607
field0184.jpg	1948	1962	KINETOPLAST	train	611	616
field0185.jpg	2229	3115	KINETOPLAST	train	495	692
field0185.jpg	2267	3170	NUCLEUS	train	504	704
field0185.jpg	2034	1287	NUCLEUS	train	452	286
field0186.jpg	1236	1592	NUCLEUS_CELL_BODY	train	275	354
field0186.jpg	1260	1508	KINETOPLAST	train	280	335
field0186.jpg	302	2233	KINETOPLAST	train	67	496
field0186.jpg	360	2177	NUCLEUS	train	80	484
field0186.jpg	2010	2589	NUCLEUS	train	447	575
field0186.jpg	1963	2635	KINETOPLAST	train	436	586
field0186.jpg	1948	3344	KINETOPLAST	train	433	743
field0186.jpg	1967	3449	NUCLEUS	train	437	766
field0187.jpg	192	1380	T_CRUZI	train	60	433
field0187.jpg	545	1830	KINETOPLAST	train	171	574
field0187.jpg	554	1893	NUCLEUS_CELL_BODY	train	174	594
field0187.jpg	623	1995	KINETOPLAST	train	195	626
field0187.jpg	635	2037	NUCLEUS	train	199	639
field0187.jpg	1398	2055	T_CRUZI	train	439	645
field0187.jpg	1538	1991	KINETOPLAST	train	483	625
field0187.jpg	1534	2028	NUCLEUS	train	481	636
field0188.jpg	1681	2035	NUCLEUS	train	374	452
field0188.jpg	1709	2078	KINETOPLAST	train	380	462
field0188.jpg	1303	3020	KINETOPLAST	train	290	671
field0188.jpg	1293	2951	NUCLEUS_CELL_BODY	train	287	656
field0188.jpg	2544	3443	NUCLEUS	train	565	765
field0188.jpg	2554	3348	KINETOPLAST	train	568	744
field0189.jpg	335	1549	KINETOPLAST	train	105	486
field0189.jpg	478	1766	KINETOPLAST	train	150	554
field0189.jpg	324	1579	NUCLEUS	train	102	495
field0189.jpg	508	1721	NUCLEUS_CELL_BODY	train	159	540
field0189.jpg	759	1749	NUCLEUS_CELL_BODY	train	238	549
field0189.jpg	785	1783	KINETOPLAST	train	246	559
field0189.jpg	1896	1713	KINETOPLAST_CELL_BODY	train	595	537
field0189.jpg	1869	1675	NUCLEUS_CELL_BODY	train	586	525
field0189.jpg	1217	2583	KINETOPLAST	train	382	810
field0189.jpg	1272	2566	NUCLEUS	train	399	805
field0189.jpg	622	2652	KINETOPLAST	train	195	832
field0189.jpg	587	2682	NUCLEUS	train	184	841
field0189.jpg	1509	2761	NUCLEUS	train	473	866
field0189.jpg	1531	2766	NUCLEUS	train	480	868
field0189.jpg	1532	2727	KINETOPLAST	train	481	856
field0189.jpg	1489	2722	KINETOPLAST	train	467	854
field0190.jpg	592	1617	KINETOPLAST	train	132	359
field0190.jpg	547	1546	NUCLEUS	train	122	344
field0190.jpg	2072	1627	NUCLEUS_CELL_BODY	train	460	362
field0190.jpg	2061	1550	KINETOPLAST	train	458	344
field0190.jpg	1398	1725	KINETOPLAST	train	311	383
field0190.jpg	1486	2053	KINETOPLAST	train	330	456
field0190.jpg	1581	2125	KINETOPLAST	train	351	472
field0190.jpg	1446	2092	NUCLEUS	train	321	465
field0190.jpg	1588	2189	NUCLEUS	train	353	486
field0190.jpg	157	2623	KINETOPLAST	train	35	583
field0190.jpg	797	2830	KINETOPLAST	train	177	629
field0190.jpg	851	2803	NUCLEUS	train	189	623
field0190.jpg	779	3297	KINETOPLAST_CELL_BODY	train	173	733
field0190.jpg	826	3271	NUCLEUS	train	184	727
field0190.jpg	205	2661	NUCLEUS	train	46	591
field0190.jpg	1454	1755	NUCLEUS	train	323	390
field0191.jpg	854	2263	NUCLEUS_CELL_BODY	train	190	503
field0191.jpg	797	2276	KINETOPLAST	train	177	506
field0191.jpg	542	2412	KINETOPLAST	train	120	536
field0191.jpg	554	2322	NUCLEUS	train	123	516
field0191.jpg	294	2945	KINETOPLAST	train	65	654
field0191.jpg	353	2924	NUCLEUS	train	78	650
field0191.jpg	2337	2683	KINETOPLAST	train	519	596
field0191.jpg	2385	2693	NUCLEUS	train	530	598
field0192.jpg	877	3258	KINETOPLAST	train	195	724
field0192.jpg	819	3235	NUCLEUS	train	182	719
field0192.jpg	2085	2793	NUCLEUS	train	463	621
field0192.jpg	2130	2776	KINETOPLAST	train	473	617
field0192.jpg	2106	2594	KINETOPLAST	train	468	576
field0192.jpg	2132	2536	NUCLEUS	train	474	564
field0192.jpg	2424	2437	NUCLEUS	train	539	542
field0192.jpg	2337	2425	KINETOPLAST	train	519	539
field0192.jpg	2603	2662	KINETOPLAST	train	578	592
field0192.jpg	2670	2691	NUCLEUS	train	593	598
field0192.jpg	2086	1645	NUCLEUS	train	464	366
field0192.jpg	1756	2549	NUCLEUS	train	390	566
field0192.jpg	503	2155	NUCLEUS	train	112	479
field0192.jpg	1407	3982	NUCLEUS	train	313	885
field0192.jpg	2034	2932	NUCLEUS	train	452	652
field0193.jpg	1486	1551	NUCLEUS	train	330	345
field0193.jpg	1487	1601	KINETOPLAST	train	330	356
field0193.jpg	1937	2082	KINETOPLAST	train	430	463
field0193.jpg	1433	2070	KINETOPLAST	train	318	460
field0193.jpg	1880	2098	NUCLEUS	train	418	466
field0193.jpg	1459	2132	NUCLEUS	train	324	474
field0193.jpg	1271	2626	NUCLEUS	train	282	584
field0193.jpg	1303	2651	KINETOPLAST	train	290	589
field0193.jpg	2177	1765	NUCLEUS	train	484	392
field0193.jpg	2054	1792	NUCLEUS	train	456	398
field0193.jpg	1429	3403	NUCLEUS	train	318	756
field0193.jpg	1966	3908	NUCLEUS	train	437	868
field0193.jpg	1948	3730	NUCLEUS	train	433	829
field0193.jpg	2455	1541	NUCLEUS	train	546	342
field0194.jpg	1932	2303	KINETOPLAST	train	429	512
field0194.jpg	1891	2318	NUCLEUS	train	420	515
field0194.jpg	2479	1941	NUCLEUS_CELL_BODY	train	551	431
field0194.jpg	2405	1888	KINETOPLAST	train	534	420
field0194.jpg	2223	2673	KINETOPLAST	train	494	594
field0194.jpg	2170	2664	NUCLEUS	train	482	592
field0194.jpg	1020	3296	NUCLEUS	train	227	732
field0194.jpg	969	3288	KINETOPLAST	train	215	731
field0195.jpg	638	2003	KINETOPLAST	train	200	628
field0195.jpg	663	1998	NUCLEUS_CELL_BODY	train	208	627
field0196.jpg	911	1807	T_CRUZI	train	286	567
field0196.jpg	2063	2248	NUCLEUS	train	647	705
field0196.jpg	1687	2288	NUCLEUS	train	529	718
field0197.jpg	723	2258	KINETOPLAST	train	161	502
field0197.jpg	811	2277	NUCLEUS	train	180	506
field0197.jpg	1146	2838	NUCLEUS_CELL_BODY	train	255	631
field0197.jpg	961	3139	NUCLEUS_CELL_BODY	train	214	698
field0197.jpg	1115	2906	KINETOPLAST	train	248	646
field0197.jpg	972	3076	KINETOPLAST	train	216	684
field0197.jpg	1478	3208	KINETOPLAST	train	328	713
field0197.jpg	1499	3252	NUCLEUS_CELL_BODY	train	333	723
field0197.jpg	2189	2197	NUCLEUS_CELL_BODY	train	486	488
field0197.jpg	2102	2241	KINETOPLAST	train	467	498
field0197.jpg	2385	2258	KINETOPLAST	train	530	502
field0197.jpg	2420	2271	NUCLEUS	train	538	505
field0197.jpg	3005	2357	NUCLEUS	train	668	524
field0197.jpg	2920	2306	KINETOPLAST	train	649	512
field0197.jpg	2565	3112	NUCLEUS	train	570	692
field0198.jpg	2026	1346	KINETOPLAST_CELL_BODY	train	636	422
field0198.jpg	2028	1315	NUCLEUS	train	636	413
field0198.jpg	1464	2563	NUCLEUS	train	459	804
field0198.jpg	1434	2592	KINETOPLAST	train	450	813
field0198.jpg	1370	2121	KINETOPLAST	train	430	665
field0198.jpg	1351	2130	NUCLEUS_CELL_BODY	train	424	668
field0198.jpg	479	2671	NUCLEUS	train	150	838
field0198.jpg	453	2728	KINETOPLAST	train	142	856
field0198.jpg	1096	2560	NUCLEUS	train	344	803
field0198.jpg	1612	1440	NUCLEUS	train	506	452
field0198.jpg	1713	1740	NUCLEUS	train	537	546
field0198.jpg	816	1565	NUCLEUS	train	256	491
field0198.jpg	485	1735	NUCLEUS	train	152	544
field0198.jpg	121	1481	NUCLEUS	train	38	465
field0199.jpg	2581	2118	KINETOPLAST	train	574	471
field0199.jpg	2561	2051	NUCLEUS_CELL_BODY	train	569	456
field0199.jpg	1887	2884	NUCLEUS	train	419	641
field0199.jpg	2245	3024	NUCLEUS	train	499	672
field0199.jpg	1952	2849	KINETOPLAST	train	434	633
field0199.jpg	2218	2948	KINETOPLAST	train	493	655
field0199.jpg	2217	3625	KINETOPLAST	train	493	806
field0199.jpg	1060	1105	NUCLEUS	train	236	246
field0200.jpg	1228	2441	KINETOPLAST	train	273	542
field0200.jpg	987	2681	KINETOPLAST	train	219	596
field0200.jpg	1262	2369	NUCLEUS	train	280	526
field0200.jpg	959	2621	NUCLEUS_CELL_BODY	train	213	582
field0200.jpg	1885	3354	NUCLEUS	train	419	745
field0200.jpg	1921	3414	KINETOPLAST	train	427	759
field0201.jpg	2342	1796	KINETOPLAST	train	520	399
field0201.jpg	2428	1800	NUCLEUS_CELL_BODY	train	540	400
field0201.jpg	2069	2649	NUCLEUS	train	460	589
field0201.jpg	2140	2705	KINETOPLAST	train	476	601
field0201.jpg	123	3167	NUCLEUS	train	27	704
field0202.jpg	1776	1626	NUCLEUS	train	395	361
field0202.jpg	1191	2189	NUCLEUS	train	265	486
field0202.jpg	655	2361	NUCLEUS	train	146	525
field0202.jpg	1395	2745	NUCLEUS	train	310	610
field0202.jpg	619	3065	NUCLEUS	train	138	681
field0202.jpg	875	3021	NUCLEUS	train	194	671
field0202.jpg	2454	2541	NUCLEUS	train	545	565
field0202.jpg	1756	1567	KINETOPLAST	train	390	348
field0202.jpg	1235	2160	KINETOPLAST	train	274	480
field0202.jpg	611	2428	KINETOPLAST	train	136	540
field0202.jpg	629	2968	KINETOPLAST	train	140	660
field0202.jpg	877	2944	KINETOPLAST	train	195	654
field0202.jpg	1351	2824	KINETOPLAST	train	300	628
field0202.jpg	2419	2600	KINETOPLAST	train	538	578
field0203.jpg	1203	2196	KINETOPLAST	train	377	689
field0203.jpg	1281	2232	KINETOPLAST	train	402	700
field0203.jpg	1222	2153	NUCLEUS_CELL_BODY	train	383	675
field0203.jpg	1339	2278	NUCLEUS_CELL_BODY	train	420	715
field0203.jpg	932	1734	T_CRUZI	train	292	544
field0203.jpg	1020	2538	KINETOPLAST	train	320	796
field0203.jpg	1009	2501	NUCLEUS	train	317	785
field0203.jpg	1100	2549	KINETOPLAST	train	345	800
field0203.jpg	1099	2587	NUCLEUS	train	345	812
field0203.jpg	328	2221	NUCLEUS	train	103	697
field0204.jpg	549	1028	NUCLEUS_CELL_BODY	train	172	323
field0204.jpg	611	1035	KINETOPLAST	train	192	325
field0204.jpg	1172	1441	KINETOPLAST_CELL_BODY	train	368	452
field0204.jpg	1200	1498	NUCLEUS_CELL_BODY	train	376	470
field0204.jpg	1732	1588	KINETOPLAST	train	543	498
field0204.jpg	1723	1551	NUCLEUS	train	541	487
field0204.jpg	2090	1486	NUCLEUS_CELL_BODY	train	656	466
field0204.jpg	2117	1524	KINETOPLAST	train	664	478
field0204.jpg	1040	2132	KINETOPLAST_CELL_BODY	train	326	669
field0204.jpg	991	2150	NUCLEUS_CELL_BODY	train	311	675
field0204.jpg	1459	2400	KINETOPLAST_CELL_BODY	train	458	753
field0204.jpg	1499	2423	NUCLEUS	train	470	760
field0204.jpg	1271	1669	NUCLEUS	train	399	524
field0204.jpg	1471	2744	NUCLEUS	train	461	861
field0204.jpg	1861	1833	NUCLEUS	train	584	575
field0205.jpg	1406	1246	NUCLEUS	train	441	391
field0205.jpg	1375	1227	KINETOPLAST	train	431	385
field0205.jpg	1891	1459	KINETOPLAST	train	593	458
field0205.jpg	1861	1468	NUCLEUS	train	584	461
field0205.jpg	1859	1646	NUCLEUS	train	583	516
field0205.jpg	1892	1663	KINETOPLAST	train	594	522
field0205.jpg	742	1702	KINETOPLAST	train	233	534
field0205.jpg	736	1741	NUCLEUS	train	231	546
field0205.jpg	1953	1145	NUCLEUS	train	613	359
field0205.jpg	701	1415	NUCLEUS	train	220	444
field0205.jpg	898	2385	NUCLEUS	train	282	748
field0206.jpg	621	1820	KINETOPLAST	train	138	404
field0206.jpg	2232	2988	KINETOPLAST	train	496	664
field0206.jpg	2287	3022	NUCLEUS	train	508	672
field0206.jpg	560	1870	NUCLEUS	train	124	416
field0207.jpg	902	1293	KINETOPLAST	train	200	287
field0207.jpg	866	1246	NUCLEUS	train	192	277
field0207.jpg	589	2801	NUCLEUS	train	131	622
field0207.jpg	901	2729	NUCLEUS_CELL_BODY	train	200	606
field0207.jpg	843	2748	KINETOPLAST	train	187	611
field0207.jpg	586	2886	KINETOPLAST	train	130	641
field0207.jpg	327	3433	KINETOPLAST	train	73	763
field0207.jpg	389	3413	NUCLEUS_CELL_BODY	train	86	758
field0207.jpg	2441	3164	NUCLEUS	train	542	703
field0207.jpg	1535	1783	NUCLEUS	train	341	396
field0208.jpg	1238	961	KINETOPLAST_CELL_BODY	train	388	301
field0208.jpg	1191	935	NUCLEUS_CELL_BODY	train	374	293
field0208.jpg	782	1325	NUCLEUS_CELL_BODY	train	245	416
field0208.jpg	852	1449	NUCLEUS_CELL_BODY	train	267	455
field0208.jpg	836	1350	KINETOPLAST	train	262	424
field0208.jpg	812	1397	KINETOPLAST_CELL_BODY	train	255	438
field0208.jpg	671	1593	KINETOPLAST	train	211	500
field0208.jpg	618	1612	NUCLEUS_CELL_BODY	train	194	506
field0208.jpg	362	1612	NUCLEUS_CELL_BODY	train	114	506
field0208.jpg	386	1663	KINETOPLAST	train	121	522
field0208.jpg	2038	1547	KINETOPLAST_CELL_BODY	train	639	485
field0208.jpg	1752	1560	KINETOPLAST	train	550	489
field0208.jpg	2049	1507	NUCLEUS	train	643	473
field0208.jpg	1767	1606	NUCLEUS_CELL_BODY	train	554	504
field0208.jpg	1227	2447	NUCLEUS	train	385	768
field0209.jpg	1290	1282	KINETOPLAST_CELL_BODY	train	405	402
field0209.jpg	1243	1268	NUCLEUS_CELL_BODY	train	390	398
field0209.jpg	978	1335	KINETOPLAST	train	307	419
field0209.jpg	950	1309	NUCLEUS	train	298	411
field0209.jpg	523	1650	KINETOPLAST_CELL_BODY	train	164	518
field0209.jpg	501	1675	NUCLEUS	train	157	525
field0209.jpg	1425	1800	NUCLEUS	train	447	565
field0209.jpg	1409	1834	KINETOPLAST	train	442	575
field0209.jpg	1795	1500	NUCLEUS	train	563	471
field0209.jpg	1281	1406	NUCLEUS	train	402	441
field0209.jpg	728	2257	NUCLEUS	train	228	708
field0210.jpg	1549	2873	KINETOPLAST	train	344	638
field0210.jpg	1579	2943	NUCLEUS_CELL_BODY	train	351	654
field0210.jpg	2950	3284	KINETOPLAST	train	656	730
field0210.jpg	2950	3239	NUCLEUS	train	656	720
field0210.jpg	388	3157	NUCLEUS	train	86	702
field0211.jpg	1491	973	KINETOPLAST_CELL_BODY	train	468	305
field0211.jpg	1458	959	NUCLEUS_CELL_BODY	train	457	301
field0211.jpg	899	1437	NUCLEUS_CELL_BODY	train	282	451
field0211.jpg	855	1395	KINETOPLAST_CELL_BODY	train	268	438
field0211.jpg	506	1420	KINETOPLAST	train	159	445
field0211.jpg	472	1459	NUCLEUS_CELL_BODY	train	148	458
field0211.jpg	464	2088	KINETOPLAST_CELL_BODY	train	146	655
field0211.jpg	482	2037	NUCLEUS_CELL_BODY	train	151	639
field0211.jpg	1011	2162	NUCLEUS	train	317	678
field0211.jpg	1656	1482	NUCLEUS	train	520	465
field0211.jpg	1577	1478	KINETOPLAST_CELL_BODY	train	495	464
field0211.jpg	1394	2549	KINETOPLAST	train	437	800
field0211.jpg	1396	2515	NUCLEUS	train	438	789
field0211.jpg	1986	2380	NUCLEUS	train	623	747
field0212.jpg	1591	915	KINETOPLAST	train	499	287
field0212.jpg	1710	1071	KINETOPLAST	train	536	336
field0212.jpg	1560	923	NUCLEUS	train	489	290
field0212.jpg	1703	1105	NUCLEUS	train	534	347
field0212.jpg	604	1498	T_CRUZI	train	189	470
field0212.jpg	707	1730	KINETOPLAST	train	222	543
field0212.jpg	648	1737	NUCLEUS	train	203	545
field0212.jpg	1031	2001	KINETOPLAST	train	323	628
field0212.jpg	1064	1988	NUCLEUS_CELL_BODY	train	334	624
field0212.jpg	1467	1802	T_CRUZI	train	460	565
field0212.jpg	1352	2150	KINETOPLAST	train	424	675
field0212.jpg	1415	2146	NUCLEUS	train	444	673
field0212.jpg	1946	1799	NUCLEUS	train	611	564
field0212.jpg	1974	1834	KINETOPLAST	train	619	575
field0213.jpg	2283	2799	KINETOPLAST	train	507	622
field0213.jpg	2277	2865	NUCLEUS	train	506	637
field0213.jpg	1286	2527	KINETOPLAST	train	286	562
field0213.jpg	1250	2481	NUCLEUS	train	278	551
field0214.jpg	786	1629	NUCLEUS	train	247	511
field0214.jpg	744	1627	KINETOPLAST	train	233	510
field0214.jpg	763	1930	NUCLEUS	train	239	605
field0214.jpg	792	1970	KINETOPLAST_CELL_BODY	train	248	618
field0214.jpg	1662	1180	NUCLEUS	train	521	370
field0215.jpg	1314	2722	KINETOPLAST	train	292	605
field0215.jpg	1343	2675	NUCLEUS	train	298	594
field0215.jpg	1082	3242	NUCLEUS	train	240	720
field0215.jpg	1119	3203	KINETOPLAST	train	249	712
field0215.jpg	1627	2325	NUCLEUS	train	362	517
field0216.jpg	1247	1302	KINETOPLAST	train	391	408
field0216.jpg	1201	1292	NUCLEUS	train	377	405
field0216.jpg	871	1679	NUCLEUS_CELL_BODY	train	273	527
field0216.jpg	910	1718	KINETOPLAST	train	285	539
field0216.jpg	610	1473	T_CRUZI	train	191	462
field0217.jpg	386	1518	T_CRUZI	train	121	476
field0217.jpg	1442	1373	KINETOPLAST	train	452	431
field0217.jpg	1474	1364	NUCLEUS_CELL_BODY	train	462	428
field0218.jpg	1560	2321	NUCLEUS	train	347	516
field0218.jpg	1471	2348	KINETOPLAST	train	327	522
field0219.jpg	1485	2305	KINETOPLAST	train	330	512
field0219.jpg	1523	2260	NUCLEUS_CELL_BODY	train	338	502
field0219.jpg	1508	3227	NUCLEUS_CELL_BODY	train	335	717
field0219.jpg	1419	3234	KINETOPLAST	train	315	719
field0220.jpg	981	2283	KINETOPLAST	train	218	507
field0220.jpg	1089	2297	NUCLEUS	train	242	510
field0221.jpg	435	1786	NUCLEUS	train	136	560
field0221.jpg	402	1804	KINETOPLAST	train	126	566
field0221.jpg	770	2056	KINETOPLAST	train	242	645
field0221.jpg	824	2045	NUCLEUS	train	259	642
field0222.jpg	1623	2568	KINETOPLAST	train	361	571
field0222.jpg	1674	2508	NUCLEUS_CELL_BODY	train	372	557
field0223.jpg	1877	2290	KINETOPLAST	train	417	509
field0223.jpg	1915	2323	NUCLEUS	train	426	516
field0223.jpg	1178	2379	NUCLEUS	train	262	529
field0223.jpg	1196	2341	KINETOPLAST	train	266	520
field0223.jpg	2428	3190	KINETOPLAST	train	540	709
field0223.jpg	2503	3230	NUCLEUS	train	556	718
field0224.jpg	1749	2607	KINETOPLAST	train	389	579
field0224.jpg	2394	2695	KINETOPLAST	train	532	599
field0224.jpg	2354	2646	NUCLEUS	train	523	588
field0225.jpg	512	1633	NUCLEUS	train	161	512
field0225.jpg	961	1686	NUCLEUS	train	301	529
field0225.jpg	1024	2062	NUCLEUS_CELL_BODY	train	321	647
field0225.jpg	521	1666	KINETOPLAST	train	163	523
field0225.jpg	987	1706	KINETOPLAST	train	310	535
field0225.jpg	991	2093	KINETOPLAST	train	311	657
field0226.jpg	1169	1950	KINETOPLAST	train	260	433
field0226.jpg	1283	1948	KINETOPLAST	train	285	433
field0226.jpg	1180	1894	NUCLEUS	train	262	421
field0226.jpg	1357	1947	NUCLEUS_CELL_BODY	train	302	433
field0226.jpg	1967	2695	NUCLEUS_CELL_BODY	train	437	599
field0226.jpg	1961	2693	NUCLEUS	train	436	598
field0226.jpg	1682	2726	NUCLEUS	train	374	606
field0226.jpg	2034	2695	KINETOPLAST	train	452	599
field0226.jpg	1642	2698	KINETOPLAST	train	365	600
field0227.jpg	1077	1952	KINETOPLAST	train	239	434
field0227.jpg	1128	1998	NUCLEUS	train	251	444
field0227.jpg	1858	2823	NUCLEUS	train	413	627
field0227.jpg	1911	2798	KINETOPLAST	train	425	622
field0227.jpg	2542	3018	KINETOPLAST	train	565	671
field0227.jpg	1466	3496	KINETOPLAST	train	326	777
field0227.jpg	1517	3562	NUCLEUS	train	337	792
field0228.jpg	1467	2542	NUCLEUS	train	326	565
field0228.jpg	1227	2496	NUCLEUS	train	273	555
field0228.jpg	1498	2634	NUCLEUS_CELL_BODY	train	333	585
field0228.jpg	1138	2520	KINETOPLAST	train	253	560
field0228.jpg	1467	2607	KINETOPLAST	train	326	579
field0228.jpg	1454	2700	KINETOPLAST	train	323	600
field0229.jpg	1725	1986	KINETOPLAST	train	383	441
field0229.jpg	1793	2004	NUCLEUS	train	398	445
field0229.jpg	1218	2671	NUCLEUS_CELL_BODY	train	271	594
field0229.jpg	1149	2699	KINETOPLAST	train	255	600
field0229.jpg	1629	3230	T_CRUZI	train	362	718
field0230.jpg	2259	2354	KINETOPLAST	train	502	523
field0230.jpg	2341	2345	NUCLEUS	train	520	521
field0231.jpg	1392	1428	NUCLEUS	train	437	448
field0231.jpg	1412	1463	KINETOPLAST	train	443	459
field0232.jpg	1355	1975	T_CRUZI	train	425	620
field0233.jpg	1353	1202	KINETOPLAST	train	301	267
field0233.jpg	1324	1132	NUCLEUS	train	294	252
field0233.jpg	1622	1777	NUCLEUS	train	360	395
field0233.jpg	1559	1764	KINETOPLAST	train	346	392
field0233.jpg	1331	1927	KINETOPLAST	train	296	428
field0233.jpg	1290	1882	NUCLEUS_CELL_BODY	train	287	418
field0233.jpg	2306	1953	NUCLEUS	train	512	434
field0233.jpg	2379	1899	KINETOPLAST	train	529	422
field0233.jpg	314	2334	KINETOPLAST	train	70	519
field0233.jpg	189	2813	KINETOPLAST	train	42	625
field0233.jpg	700	3044	KINETOPLAST	train	156	676
field0233.jpg	225	2351	NUCLEUS	train	50	522
field0233.jpg	199	2704	NUCLEUS	train	44	601
field0233.jpg	698	2979	NUCLEUS	train	155	662
field0233.jpg	1922	3588	KINETOPLAST	train	427	797
field0233.jpg	1846	3610	NUCLEUS	train	410	802
field0234.jpg	1349	1231	KINETOPLAST_CELL_BODY	train	423	386
field0234.jpg	1615	1416	KINETOPLAST_CELL_BODY	train	507	444
field0234.jpg	1305	1231	NUCLEUS	train	409	386
field0234.jpg	1583	1427	NUCLEUS_CELL_BODY	train	497	448
field0234.jpg	414	1672	NUCLEUS_CELL_BODY	train	130	525
field0234.jpg	624	1657	NUCLEUS	train	196	520
field0234.jpg	617	1606	KINETOPLAST_CELL_BODY	train	194	504
field0234.jpg	417	1729	KINETOPLAST_CELL_BODY	train	131	542
field0234.jpg	555	1894	T_CRUZI	train	174	594
field0234.jpg	1196	2110	T_CRUZI	train	375	662
field0234.jpg	912	2329	KINETOPLAST	train	286	731
field0234.jpg	905	2274	NUCLEUS_CELL_BODY	train	284	713
field0234.jpg	1141	1834	KINETOPLAST_CELL_BODY	train	358	575
field0234.jpg	1618	2077	KINETOPLAST	train	508	652
field0234.jpg	1624	2024	NUCLEUS_CELL_BODY	train	509	635
field0234.jpg	907	2273	NUCLEUS_CELL_BODY	train	285	713
field0234.jpg	907	2273	NUCLEUS_CELL_BODY	train	285	713
field0235.jpg	2028	1705	NUCLEUS	train	451	379
field0235.jpg	2050	1760	KINETOPLAST	train	456	391
field0235.jpg	2059	2309	KINETOPLAST	train	458	513
field0235.jpg	2127	2338	NUCLEUS	train	473	520
field0235.jpg	1934	2841	NUCLEUS_CELL_BODY	train	430	631
field0235.jpg	1859	2859	KINETOPLAST	train	413	635
field0235.jpg	1036	2930	KINETOPLAST	train	230	651
field0235.jpg	980	2937	NUCLEUS_CELL_BODY	train	218	653
field0236.jpg	1752	1321	KINETOPLAST	train	550	414
field0236.jpg	1724	1348	NUCLEUS	train	541	423
field0236.jpg	1946	1753	NUCLEUS	train	611	550
field0236.jpg	1987	1780	KINETOPLAST	train	623	558
field0236.jpg	1306	1836	KINETOPLAST	train	410	576
field0236.jpg	1140	1884	KINETOPLAST	train	358	591
field0236.jpg	991	1761	T_CRUZI	train	311	552
field0236.jpg	1099	1873	NUCLEUS_CELL_BODY	train	345	588
field0236.jpg	1305	1877	NUCLEUS	train	409	589
field0237.jpg	1529	2142	NUCLEUS	train	340	476
field0237.jpg	1478	2189	KINETOPLAST	train	328	486
field0237.jpg	1952	2455	KINETOPLAST	train	434	546
field0237.jpg	1932	2532	NUCLEUS	train	429	563
field0237.jpg	558	2447	NUCLEUS_CELL_BODY	train	124	544
field0237.jpg	540	2359	KINETOPLAST	train	120	524
field0237.jpg	1631	3060	KINETOPLAST	train	362	680
field0237.jpg	1632	3127	NUCLEUS	train	363	695
field0237.jpg	3051	2376	KINETOPLAST	train	678	528
[truncated: 3,251 more rows]
